# Supplementary material
Source: PubMed Central journal article supplement (PMC7105953)
Supplement: jamainternmed-180-666-s002.pdf [file jamainternmed-180-666-s002.pdf]

## Supplementary Online Content

Smith-Bindman R, Chu P, Wang Y, et al. Comparison of the effectiveness of single-component and multicomponent interventions for reducing radiation doses in patients undergoing computed tomography: a randomized clinical trial. *JAMA Intern Med*. Published online March 30, 2020. doi:10.1001/jamainternmed.2020.0064

**eFigure.** Study Timeline

**eAppendix:** Audit Report, selected pages

This supplementary material has been provided by the authors to give readers additional information about their work.

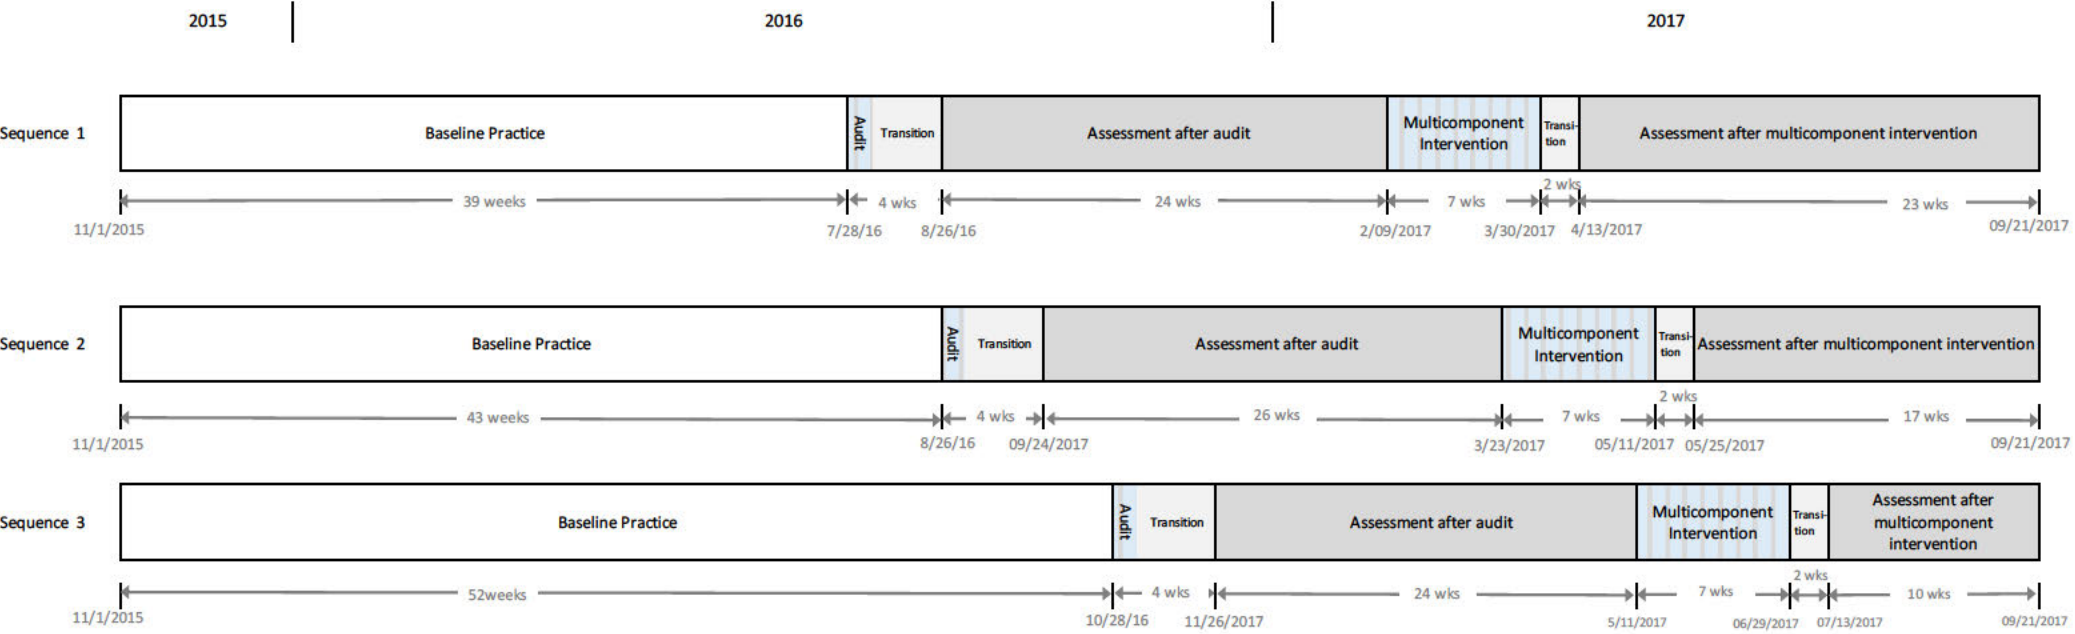

**eFigure. Study Timeline**

Blue, audit feedback or complex intervention; light gray, transition before assessment; gray, assessment period.

**eAppendix**  
**Selected Content from Audit Report**

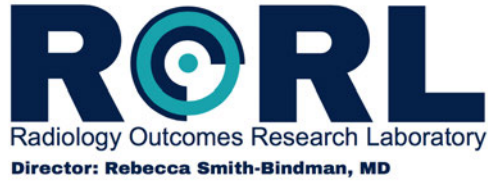

You are receiving this audit as part of a study on CT Dose optimization.

Our intention is that your audit be distributed as widely as possible to people who work within your facility. Additionally, anyone who can influence practice at your facility should also have access to the audit.

We do not want people sharing results across facilities, but understand that this may be difficult given possible personnel overlap. Any administrators who receive the audit for facilities in your track should share this with staff who work at or influence your facility, even if they also work at or manage other facilities.

However, **to help us maintain a robust study design and to maximize our chances of identifying change**, we hope all facilities will restrict their audit discussions to only those facilities in their respective tracks. Please do not distribute the report to any organization, institution, or company outside of that listed on the audit report.

If you have any questions, issues, or comments regarding the audit and/or data, please contact UCSF study personnel: Principal Investigator, Dr. Rebecca Smith-Bindman, [rebecca.smith-bindman@ucsf.edu](mailto:rebecca.smith-bindman@ucsf.edu); Project Manager, Naomi López-Solano, [naomi.lopez-solano@ucsf.edu](mailto:naomi.lopez-solano@ucsf.edu); and/or Research Assistant, Donna Liu, [donna.liu@ucsf.edu](mailto:donna.liu@ucsf.edu).

If you are not the intended recipient of this audit, you are prohibited from sharing, copying, or otherwise using or disclosing its contents.

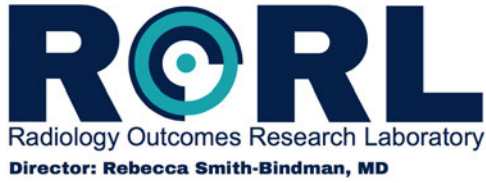

This report can help guide dose optimization by showing you how your doses compare with other facilities. Each facility’s doses in the head, chest, and abdomen were provided a grade of A, B, or C. You will only receive a grade if you have more than 12 scans for any of these anatomical regions. Based on DLP values (see Section A),

Your head grade is: B.

Your chest grade is: C. Your median DLP in the chest is 460 compared with 130 for the best sites.

Your abdomen grade is: B.

## Table of Contents

|                                                                                               |    |
|-----------------------------------------------------------------------------------------------|----|
| Summary of your data . . . . .                                                                | 1  |
| How to use this report . . . . .                                                              | 4  |
| A. Comparisons of your dose distribution to other facilities . . . . .                        | 5  |
| B. Comparison of your doses to other facilities by device . . . . .                           | 10 |
| C. Relative contribution to dose of specific protocols at your facility . . . . .             | 17 |
| D. Doses of your most common protocols compared with those at best performing sites . . . . . | 24 |
| E. Patients who received the highest doses at your facility . . . . .                         | 49 |
| F. Effect of changing specific parameters on doses received by your patients . . . . .        | 52 |
| G. Chest-Abdomen-Pelvis (CAP) frequency . . . . .                                             | 65 |

## Summary of your data

These are the data we are using for your report. Please check the specific machines and the numbers of studies we have listed to ensure we have collected data from all of your CT machines. “CAP” refers to combined chest-abdomen-pelvis scans.

Table 1: Scans

|          | Head | Chest | CAP | Abdomen | Total |
|----------|------|-------|-----|---------|-------|
| Children | 197  | 10    | 2   | 82      | 291   |
| Adults   | 3742 | 2034  | 426 | 3864    | 10066 |

Table 2: Scans by device/machine

| Device/machine name       | Head | Chest | CAP | Abdomen | Total |
|---------------------------|------|-------|-----|---------|-------|
| BRILLIANCE 16/PMRS_5212   | 126  | 430   | 14  | 106     | 676   |
| SENSATION 64/CT54702      | 1184 | 415   | 0   | 1028    | 2627  |
| SOM DEF AS/MHR_CT_PAVNAV  | 1933 | 694   | 149 | 1735    | 4511  |
| SOM DEF AS/SML-CT-SMDEF64 | 535  | 274   | 85  | 634     | 1528  |
| SOM DEF/MHR_CT_T2ACWS     | 161  | 231   | 180 | 443     | 1015  |

Table 3: Number of unique protocols by device/machine

| Device/machine name       | Head | Chest | CAP | Abdomen | Total |
|---------------------------|------|-------|-----|---------|-------|
| BRILLIANCE 16/PMRS_5212   | 3    | 6     | 4   | 7       | 20    |
| SENSATION 64/CT54702      | 10   | 9     | 0   | 21      | 40    |
| SOM DEF AS/MHR_CT_PAVNAV  | 16   | 14    | 16  | 27      | 73    |
| SOM DEF AS/SML-CT-SMDEF64 | 14   | 8     | 10  | 17      | 49    |
| SOM DEF/MHR_CT_T2ACWS     | 9    | 11    | 9   | 17      | 46    |

The following plot (or plots) show the number of diagnostic scans for adults for the head, chest, and abdomen/pelvis over time for each of your machines. Each plot is identified with the specific machine name recorded in your data file. Please let us know if this does not correspond with your expected volume for CT scans of the head, chest, and abdomen/pelvis. If there is a gap in scans for a given period, it means we do not have scans for this period in the data we are summarizing in this report.

**SOM DEF AS/MHR\_CT\_PAVNAV**

N = 4307 CT scans

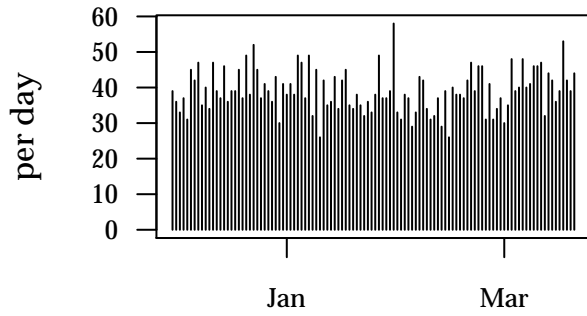

**SENSATION 64/CT54702**

N = 2581 CT scans

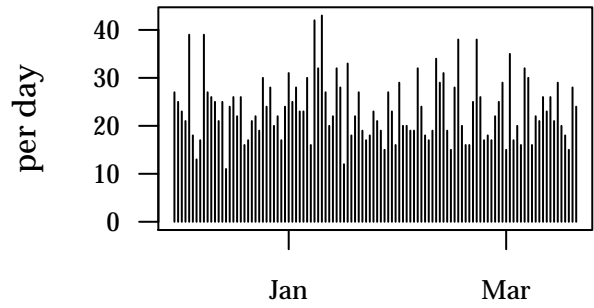

**SOM DEF AS/SML-CT-SMDEF64**

N = 1505 CT scans

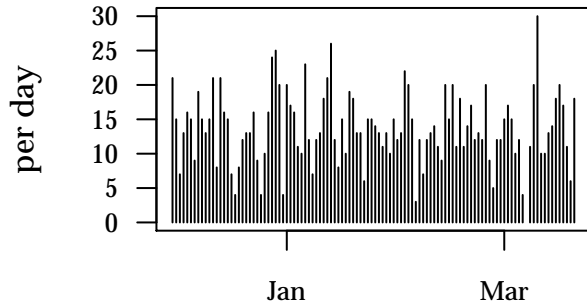

**SOM DEF/MHR\_CT\_T2ACWS**

N = 997 CT scans

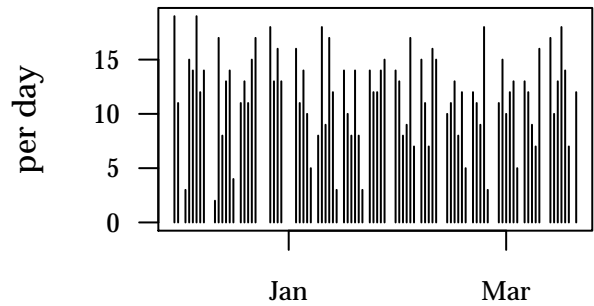

## How to use this report

This is the second audit report we are providing for your facility during your participation in the study. This detailed report provides a summary of the CT dose metrics collected from your facility, information on most commonly used protocols, graphs on technical parameters, and an appendix with more in-depth dose information. The results are adjusted for patient size, and many of the results are shown comparing your facility to other facilities that use the same type of equipment. The purpose is to help you understand how your doses – in general – compare to doses at the other facilities that are participating in the project and provide you with ideas where there may be opportunities to lower and to standardize your doses. The purpose is to supplement other dose optimization activities at your facility. This report does not tell you whether your doses are adequate for diagnosis. You must decide whether your images are satisfactory for diagnosis. You must re-evaluate image quality every time you change your protocols.

The report primarily describes the doses you use in the head, chest and abdomen (the abdomen category includes all examinations of the abdomen and/or pelvis). We also provide one graph showing examinations that include the chest, abdomen and pelvis (CAP). We do not summarize other CT examination types, such as combined anatomic areas, the spine, etc. in this report.

The report includes separate analysis in children only if your facility has contributed a sufficient volume of pediatric CT examinations.

Most of the feedback will be provided using two dose metrics: CT dose index volume (CTDIvol) and dose length product (DLP), both of which reflect dose measures directly reported by the CT scanner. CTDIvol reflects the average dose per slice, while DLP reflects the total output of the scanner, calculated as the dose per slice multiplied by the scan length.

The report provides feedback on your average doses and the proportion of doses above the benchmarks, calculated among all facilities that participate in the Partnership for DOSE. Benchmarks were set at the 75th percentile. This means that on average, across all of the facilities, 25%, or one quartile, of doses within each anatomic area will be above the benchmark. If your number is higher than this number, it means you have a larger proportion of high dose studies in comparison to other facilities.

The “best performing facilities” are defined as those facilities that have doses in the lowest quartile. You must decide if it is appropriate to alter your parameters in part based on your patients, radiologists, types of equipment, and the types of clinical questions that are imaged at your facility.



## A. Comparisons of your dose distribution to other facilities

The graphs in this section show the distribution in dose for each facility in your track, ranked from highest to the lowest median dose. Each graph shows a series of boxplots, one for each facility in your track. There are 156 facilities in your track, so there are 156 boxplots in these graphs.

Like a histogram, a boxplot is a way to summarize a distribution of values, but it focuses on only a handful of those values.

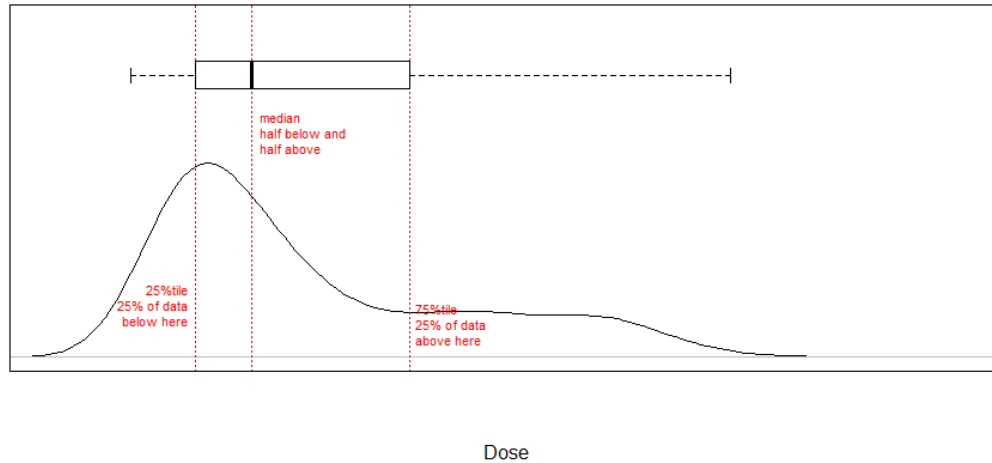

In the example above, you can see a bell-shaped curve that shows the distribution of dose, like a histogram. Three dotted vertical lines show the 25th percentile, the 50th percentile (that is, the median), and the 75th percentile doses. Above the bell-shaped curve is a box, which is another way to summarize the same data as in the bell-shaped curve. The left-hand edge of the box coincides with the 25th percentile; the right-hand edge coincides with the 75th percentile. The thicker black line in the middle of the box is the median dose. If the length of the box is short, it means the doses were concentrated in a narrow range. If the box is long, it means the dose distribution was spread out. In this example, the dose distribution has a longer right-hand side than left-hand side. Accordingly, the boxplot is longer on the right than on the left of the median. The dotted lines coming out of the box extend to the extreme values and show the asymmetry in the dose distribution. For the example above, the right side of the distribution spreads out much further from the median and beyond the 75th percentile.

On the following pages, at the top of each graph, you will see a boxplot in red, followed by one boxplot for each facility in your track. The red boxplot at the top summarizes the doses over all facilities. Your facility is identified and indicated in dark blue. If your institution has other facilities included in this track they will be shown in a lighter shade of blue.

The summary tables below the plots report the 25th percentile, median, and 75th percentile dose for your facility and for all scans across all facilities. In addition, you can also see the proportion of your cases whose dose exceeded either the median dose or the benchmark dose, which is set at the 75th percentile of all doses. For example, over all facilities and all scans, 50% of cases will exceed the median, and 25% will exceed the 75th percentile benchmark. Thus, you should compare the values in those columns with 50 or 25, respectively.

Head

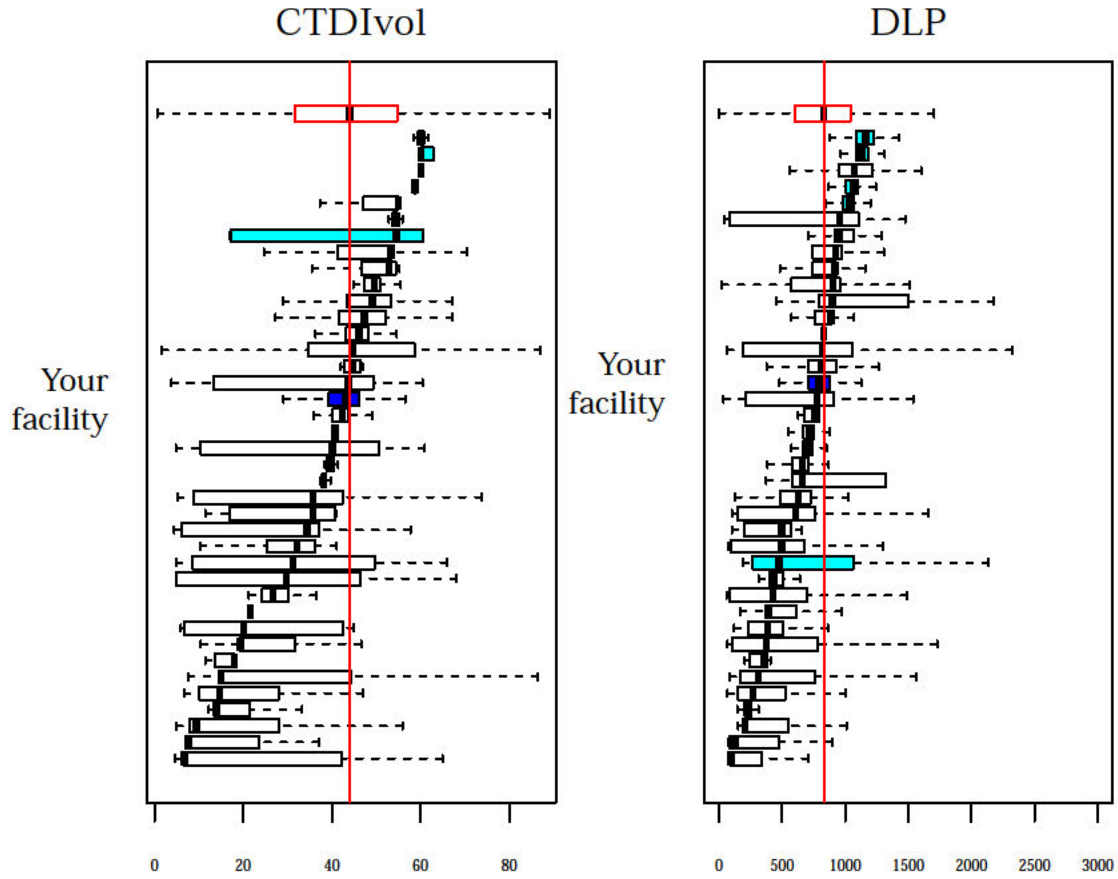

|                 | 25%tile | median | 75%tile | %>median | %>benchmark |
|-----------------|---------|--------|---------|----------|-------------|
| overall CTDIvol | 32      | 44     | 55      | 51       | 25          |
| your CTDIvol    | 39      | 43     | 46      | 43       | 3           |

|             | 25%tile | median | 75%tile | %>median | %>benchmark |
|-------------|---------|--------|---------|----------|-------------|
| overall DLP | 599     | 832    | 1042    | 54       | 29          |
| your DLP    | 713     | 791    | 880     | 44       | 9           |

Chest

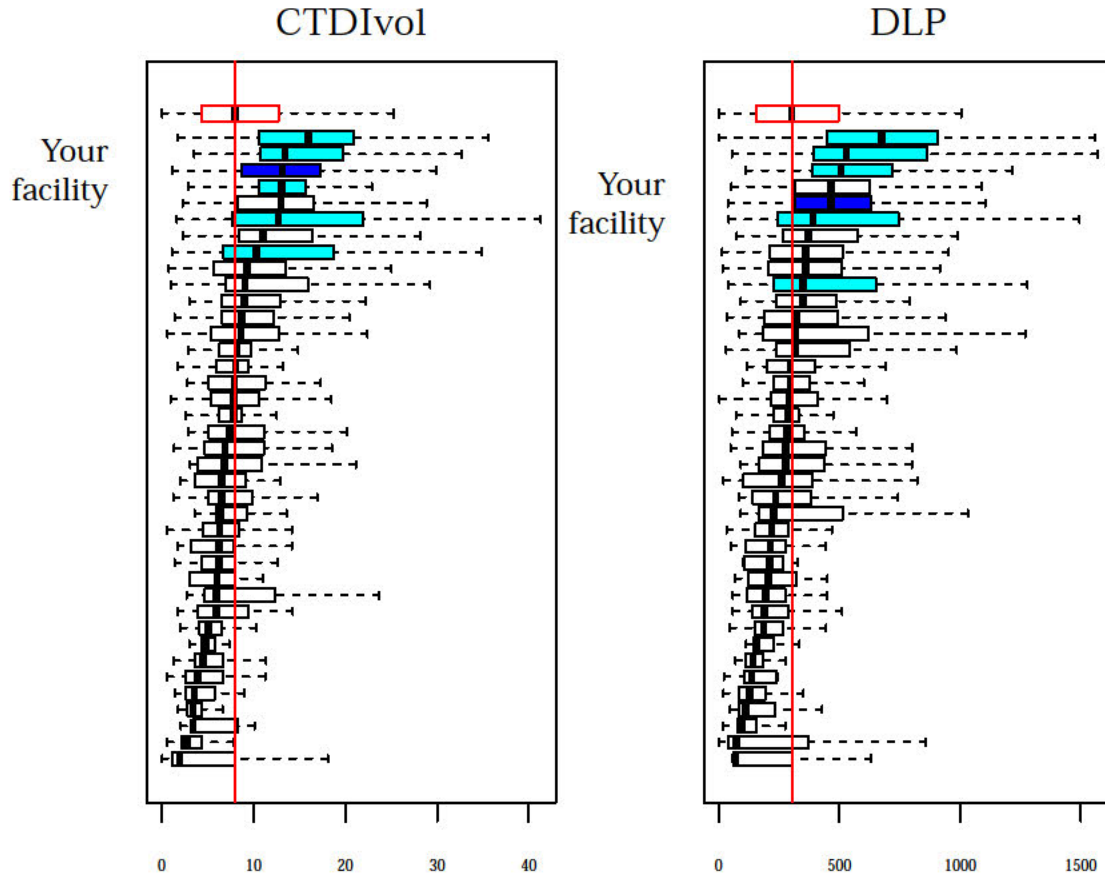

|                 | 25%tile | median | 75%tile | %>median | %>benchmark |
|-----------------|---------|--------|---------|----------|-------------|
| overall CTDIvol | 4       | 8      | 13      | 49       | 20          |
| your CTDIvol    | 9       | 13     | 17      | 79       | 45          |

|             | 25%tile | median | 75%tile | %>median | %>benchmark |
|-------------|---------|--------|---------|----------|-------------|
| overall DLP | 156     | 303    | 496     | 49       | 22          |
| your DLP    | 314     | 464    | 630     | 75       | 38          |

### Abdomen

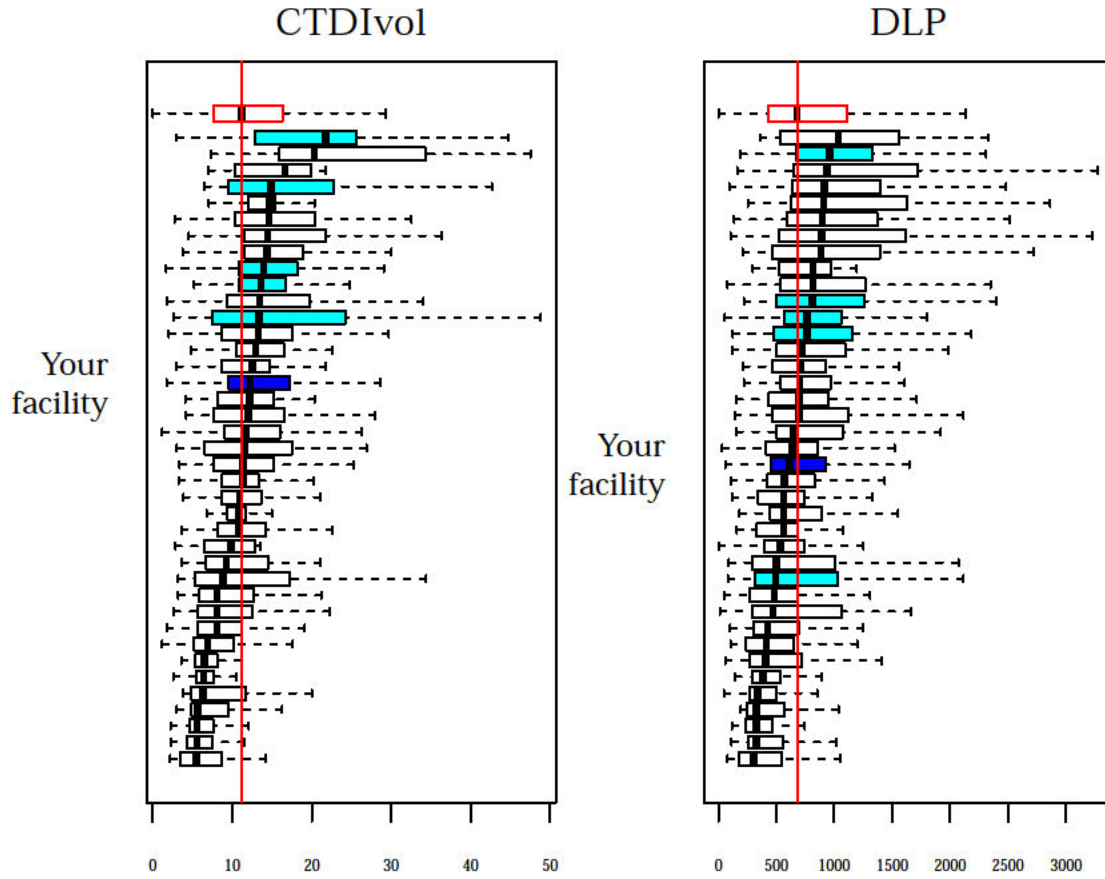

|                 | 25%tile | median | 75%tile | %>median | %>benchmark |
|-----------------|---------|--------|---------|----------|-------------|
| overall CTDIvol | 8       | 11     | 16      | 49       | 22          |
| your CTDIvol    | 10      | 12     | 17      | 58       | 25          |

|             | 25%tile | median | 75%tile | %>median | %>benchmark |
|-------------|---------|--------|---------|----------|-------------|
| overall DLP | 431     | 680    | 1113    | 49       | 24          |
| your DLP    | 452     | 618    | 930     | 42       | 16          |

The following graphs show the distribution in dose for your facility compared with the distribution across all facilities. The boxplots above show how your facility (in blue) compares to all other facilities in your track, and with the overall distribution (in red). The graphs below give you a detailed comparison of your dose distribution against the overall dose distribution of all facilities combined. Just as above, the heavy red line shows the distribution for all facilities and machines combined; the blue line is the distribution of dose in your facility. You should check whether your doses are shifted right (higher) than the overall. The width of the distribution tells you if you have more dose variability than other facilities. You should also see if there are multiple peaks in the distribution in your doses. If there is a bi- or tri-modal distribution, this may be due to a few “outlying” protocols.

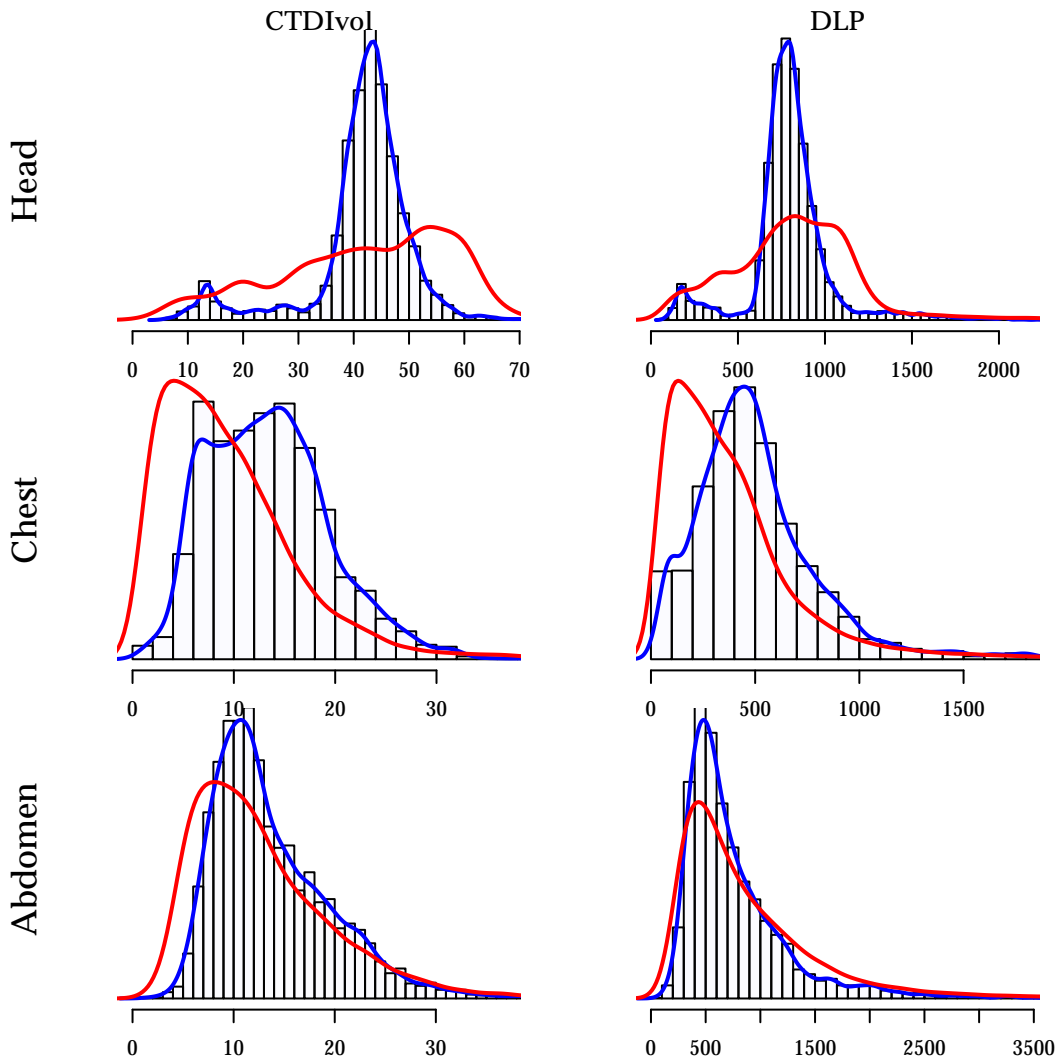

## B. Comparison of your doses to other facilities by device

These plots and tables show you how your doses compare with all other facilities that are using the same type of devices. For each device type, and each anatomical area, we show how your doses compare to all facilities using this device and to the “best performing facilities,” meaning those facilities who have achieved the lowest 25% of doses. The tables show your mean CTDIvol and DLP, and compares them to the means over all other facilities who use the same device; that is, the column labeled “AvgDose” is the average dose for all scanners of the same device make and model.

After adjusting for patient factors, all scanners were ranked. The tables also show the ranking for each scanner at your facility. Among all facilities participating in the Partnership for DOSE, there are a total of 172 individual scanners, of 46 different device models. Some models are more common than others, of course, so if your facility uses one of the more popular ones there may be more than a dozen other examples of your same device against which to compare; if you use one of the less common ones you may have only one or two comparisons, or even none. In the tables below, the “rank” that is reported is out of 172 unique scanners.

The plots show the average patient-adjusted dose for all scanners in the Partnership for DOSE, for each anatomical region. Each dot shows the mean dose for CTDIvol and DLP for that scanner. Your scanner is identified in dark blue. All other scanners of that same model type are shown in lighter blue. If you have two or more scanners of the same model type, you will see two or more dark blue dots. If your scanner is rare or unique, you may see few or no other light blue dots.

The general pattern and location of the light blue dots tells you how scanners of your model type compare with all other scanners of any type. The location of your dark blue dot tells you both how your scanner compares with both a) all other scanners, and b) all other scanners of the same model.

# HEAD

## BRILLIANCE 16

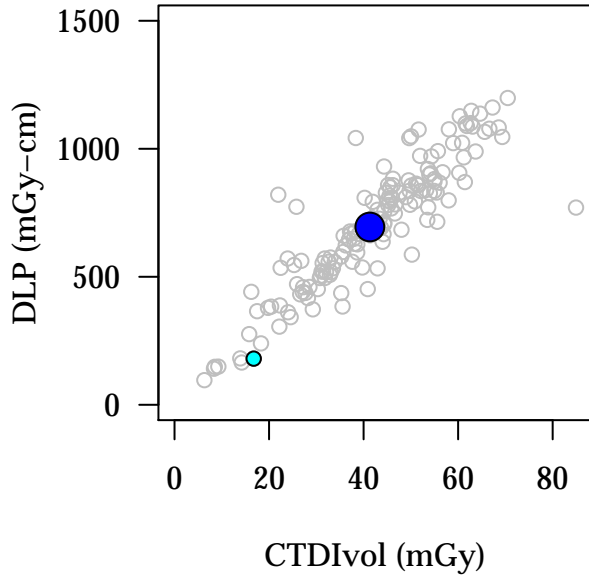

## SENSATION 64

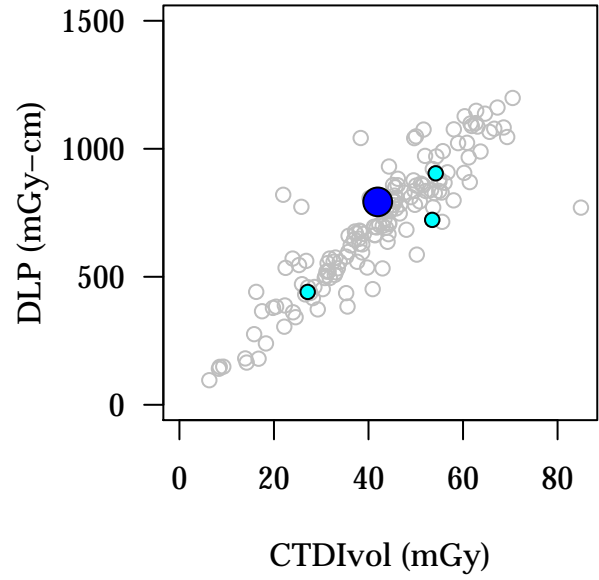

## SOM DEF

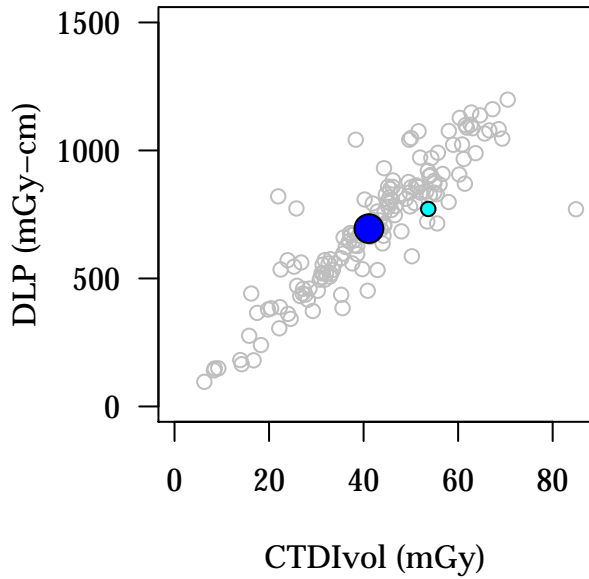

## SOM DEF AS

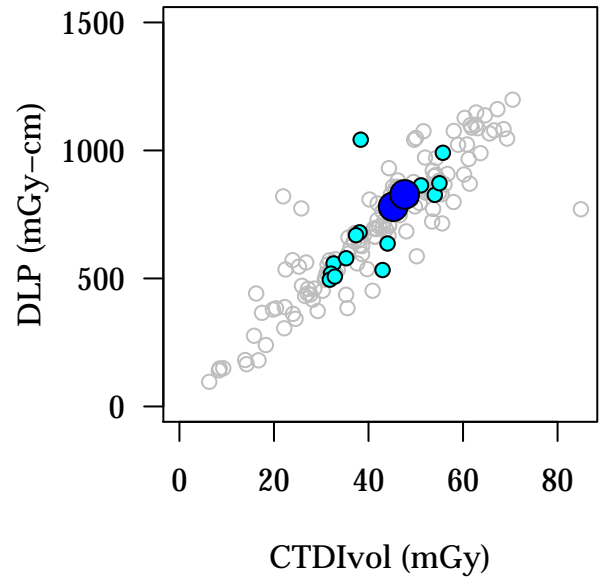

Table 10: BRILLIANCE 16 ~ PMRS\_5212

| metric        | BestDose | AvgDose | YourDose |
|---------------|----------|---------|----------|
| CTDIvol (mGy) | 17       | 32      | 41       |
| DLP (mGy-cm)  | 180      | 493     | 695      |

Table 11: SENSATION 64 ~ CT54702

| metric        | BestDose | AvgDose | YourDose |
|---------------|----------|---------|----------|
| CTDIvol (mGy) | 27       | 42      | 42       |
| DLP (mGy-cm)  | 722      | 757     | 793      |

Table 12: SOM DEF ~ MHR\_CT\_T2ACWS

| metric        | BestDose | AvgDose | YourDose |
|---------------|----------|---------|----------|
| CTDIvol (mGy) | 41       | 48      | 41       |
| DLP (mGy-cm)  | 695      | 736     | 695      |

Table 13: SOM DEF AS ~ MHR\_CT\_PAVNAV

| metric        | BestDose | AvgDose | YourDose |
|---------------|----------|---------|----------|
| CTDIvol (mGy) | 38       | 40      | 45       |
| DLP (mGy-cm)  | 671      | 689     | 780      |

Compared with all other SOM DEF AS scanners, DLP for MHR.CT.PAVNAV are AVERAGE

Table 14: SOM DEF AS ~ SML-CT-SMDEF64

| metric        | BestDose | AvgDose | YourDose |
|---------------|----------|---------|----------|
| CTDIvol (mGy) | 38       | 40      | 48       |
| DLP (mGy-cm)  | 777      | 689     | 828      |

Compared with all other SOM DEF AS scanners, DLP for SML-CT-SMDEF64 are WORSE THAN AVERAGE



# CHEST

## BRILLIANCE 16

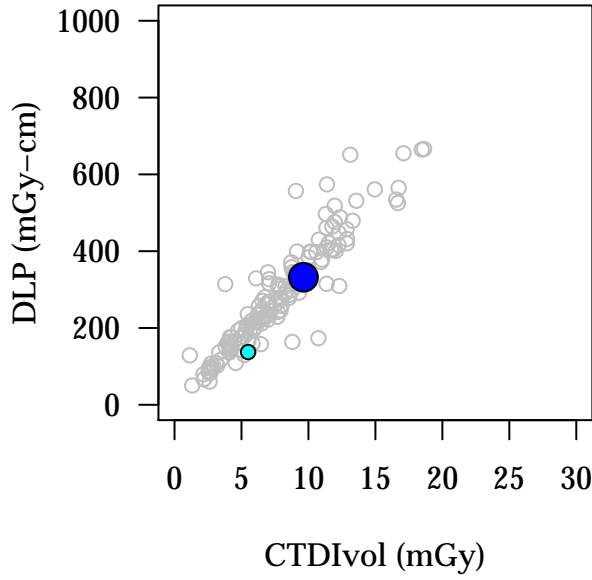

## SENSATION 64

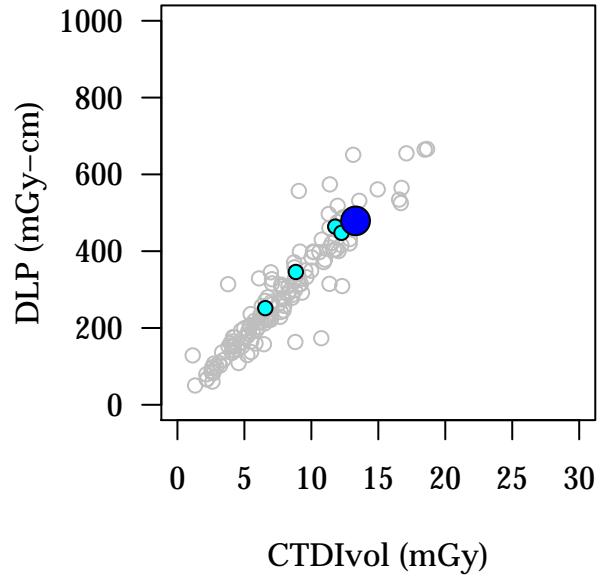

## SOM DEF

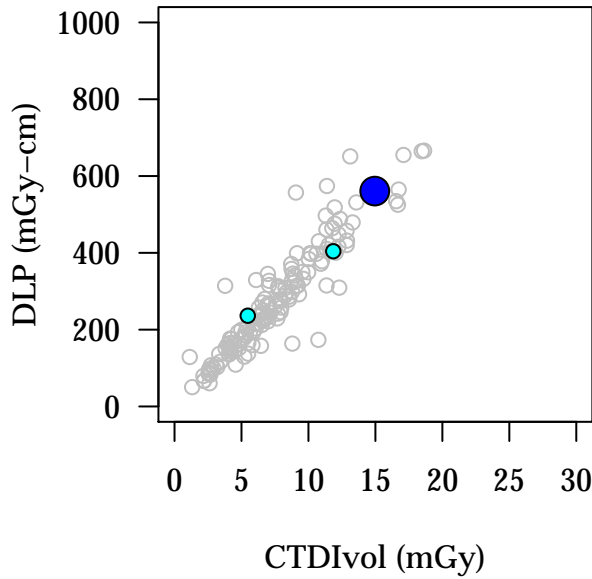

## SOM DEF AS

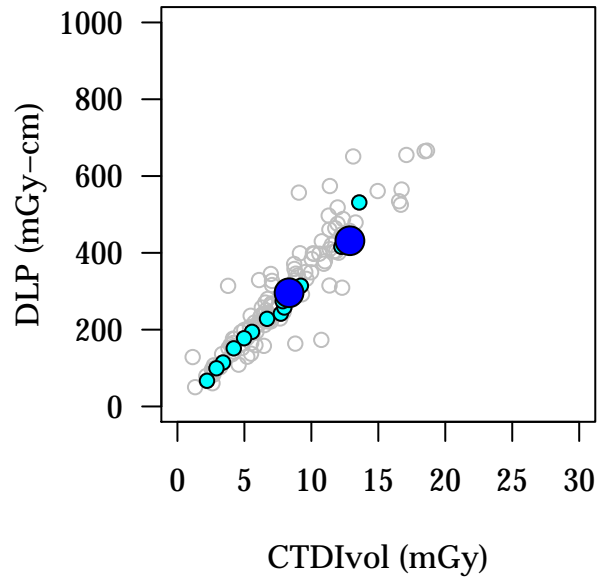

Table 15: BRILLIANCE 16 ~ PMRS\_5212

| metric        | BestDose | AvgDose | YourDose |
|---------------|----------|---------|----------|
| CTDIvol (mGy) | 5        | 9       | 10       |
| DLP (mGy-cm)  | 137      | 296     | 332      |

Table 16: SENSATION 64 ~ CT54702

| metric        | BestDose | AvgDose | YourDose |
|---------------|----------|---------|----------|
| CTDIvol (mGy) | 12       | 12      | 13       |
| DLP (mGy-cm)  | 464      | 444     | 479      |

Table 17: SOM DEF ~ MHR\_CT\_T2ACWS

| metric        | BestDose | AvgDose | YourDose |
|---------------|----------|---------|----------|
| CTDIvol (mGy) | 5        | 11      | 15       |
| DLP (mGy-cm)  | 236      | 409     | 561      |

Table 18: SOM DEF AS ~ MHR\_CT\_PAVNAV

| metric        | BestDose | AvgDose | YourDose |
|---------------|----------|---------|----------|
| CTDIvol (mGy) | 8        | 8       | 13       |
| DLP (mGy-cm)  | 276      | 267     | 432      |

Compared with all other SOM DEF AS scanners, DLP for MHR.CT.PAVNAV are WORSE THAN AVERAGE

Table 19: SOM DEF AS ~ SML-CT-SMDEF64

| metric        | BestDose | AvgDose | YourDose |
|---------------|----------|---------|----------|
| CTDIvol (mGy) | 6        | 8       | 8        |
| DLP (mGy-cm)  | 206      | 267     | 296      |

Compared with all other SOM DEF AS scanners, DLP for SML-CT-SMDEF64 are WORSE THAN AVERAGE

# ABDOMEN

## BRILLIANCE 16

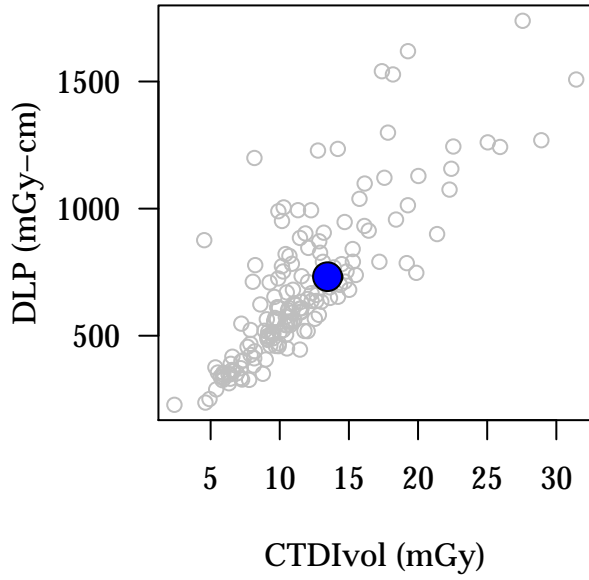

## SENSATION 64

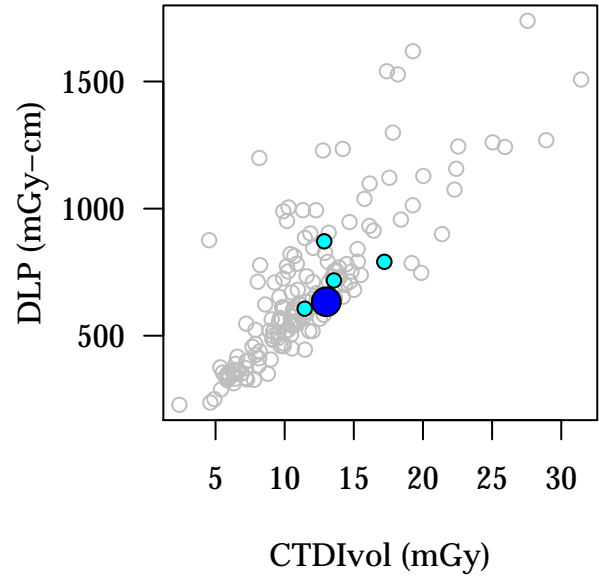

## SOM DEF

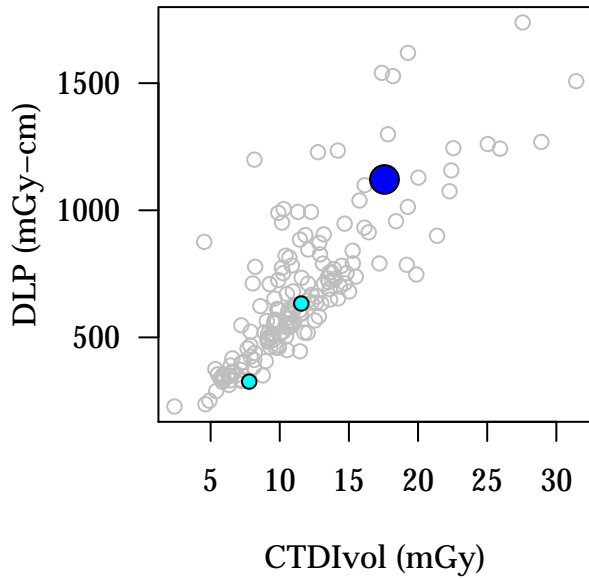

## SOM DEF AS

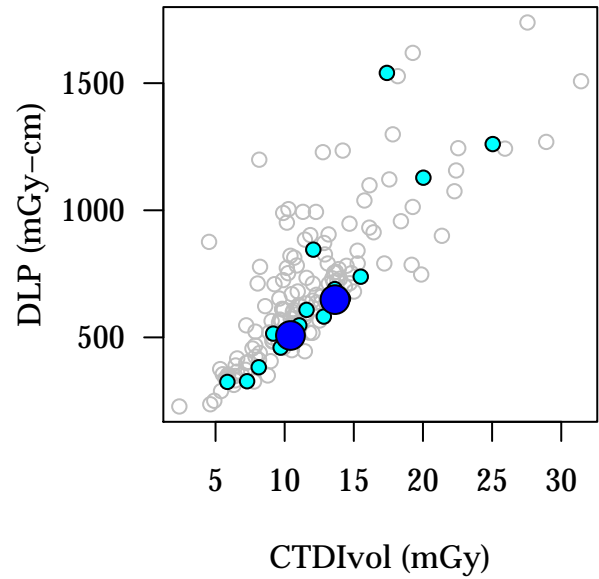

Table 20: BRILLIANCE 16 ~ PMRS\_5212

| metric        | BestDose | AvgDose | YourDose |
|---------------|----------|---------|----------|
| CTDIvol (mGy) | 13       | 14      | 13       |
| DLP (mGy-cm)  | 731      | 732     | 732      |

Table 21: SENSATION 64 ~ CT54702

| metric        | BestDose | AvgDose | YourDose |
|---------------|----------|---------|----------|
| CTDIvol (mGy) | 12       | 13      | 13       |
| DLP (mGy-cm)  | 606      | 689     | 634      |

Table 22: SOM DEF ~ MHR\_CT\_T2ACWS

| metric        | BestDose | AvgDose | YourDose |
|---------------|----------|---------|----------|
| CTDIvol (mGy) | 8        | 13      | 18       |
| DLP (mGy-cm)  | 326      | 716     | 1121     |

Table 23: SOM DEF AS ~ MHR\_CT\_PAVNAV

| metric        | BestDose | AvgDose | YourDose |
|---------------|----------|---------|----------|
| CTDIvol (mGy) | 11       | 13      | 14       |
| DLP (mGy-cm)  | 600      | 707     | 649      |

Compared with all other SOM DEF AS scanners, DLP for MHR.CT.PAVNAV are AVERAGE

Table 24: SOM DEF AS ~ SML-CT-SMDEF64

| metric        | BestDose | AvgDose | YourDose |
|---------------|----------|---------|----------|
| CTDIvol (mGy) | 8        | 13      | 10       |
| DLP (mGy-cm)  | 325      | 707     | 508      |

Compared with all other SOM DEF AS scanners, DLP for SML-CT-SMDEF64 are AVERAGE

### C. Relative contribution to dose of specific protocols at your facility

The number of protocols that are used at your facility for head, chest, and abdomen scans are provided at the beginning of this report. The graphs on the following pages show you – for a limited number of those protocols– how the dose, and the frequency that you use these protocols, varies. The y-axis shows the percent of the total dose at your facility that comes from each protocol, and the x-axis the frequency that you use this protocol. Protocols that fall along the diagonal line can be considered “typical dose” protocols – as they account for an average amount of doses. Protocols that fall above the line use more than an average amount of dose, and the farther they fall from the line, the higher their relative dose. Protocols that fall below the line use less than an average amount of dose compared to other protocols. It is not necessarily wrong for a protocol to lie far from the line as it simply reflects its relative contribution. The table below shows you the potential dose reduction that could be achieved (as a proportion of all of the dose at your facility) by altering how often you use particular protocol or by altering the parameters of these protocols to make them closer to the average.

### CTDIvol, Chest

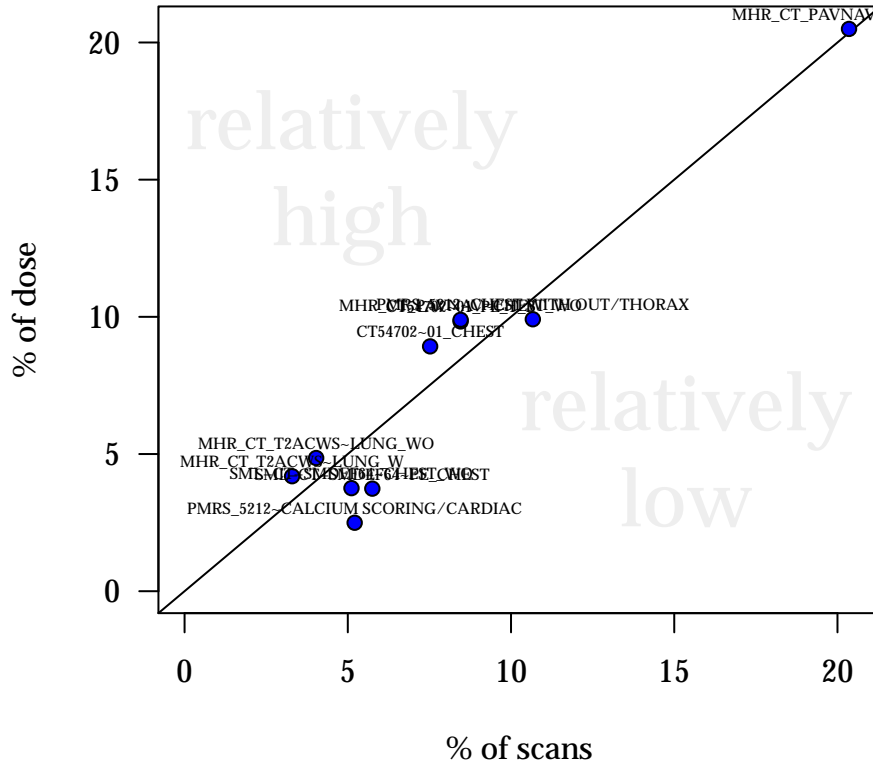

| Machine~Protocol Name             | % scans | % dose | Abs. diff | % diff | ratio |
|-----------------------------------|---------|--------|-----------|--------|-------|
| MHR_CT_PAVNAV~CHEST_WO            | 8.5     | 9.9    | 1.4       | 17.0   | 1.2   |
| CT54702~01_CHEST                  | 7.5     | 8.9    | 1.4       | 18.6   | 1.2   |
| CT54702~01_PE_T_B                 | 8.5     | 9.8    | 1.4       | 16.3   | 1.2   |
| MHR_CT_T2ACWS~LUNG_W              | 3.3     | 4.2    | 0.9       | 27.2   | 1.3   |
| MHR_CT_T2ACWS~LUNG_WO             | 4.0     | 4.9    | 0.8       | 20.4   | 1.2   |
| MHR_CT_PAVNAV~PE_CHEST            | 20.4    | 20.5   | 0.1       | 0.7    | 1.0   |
| PMRS_5212~CHEST WITH OUT/THORAX   | 10.7    | 9.9    | -0.8      | -7.1   | 0.9   |
| SML-CT-SMDEF64~CHEST_WO           | 5.1     | 3.8    | -1.4      | -26.5  | 0.7   |
| SML-CT-SMDEF64~PE_CHEST           | 5.8     | 3.7    | -2.0      | -35.0  | 0.6   |
| PMRS_5212~CALCIUM SCORING/CARDIAC | 5.2     | 2.5    | -2.7      | -52.1  | 0.5   |

### DLP, Chest

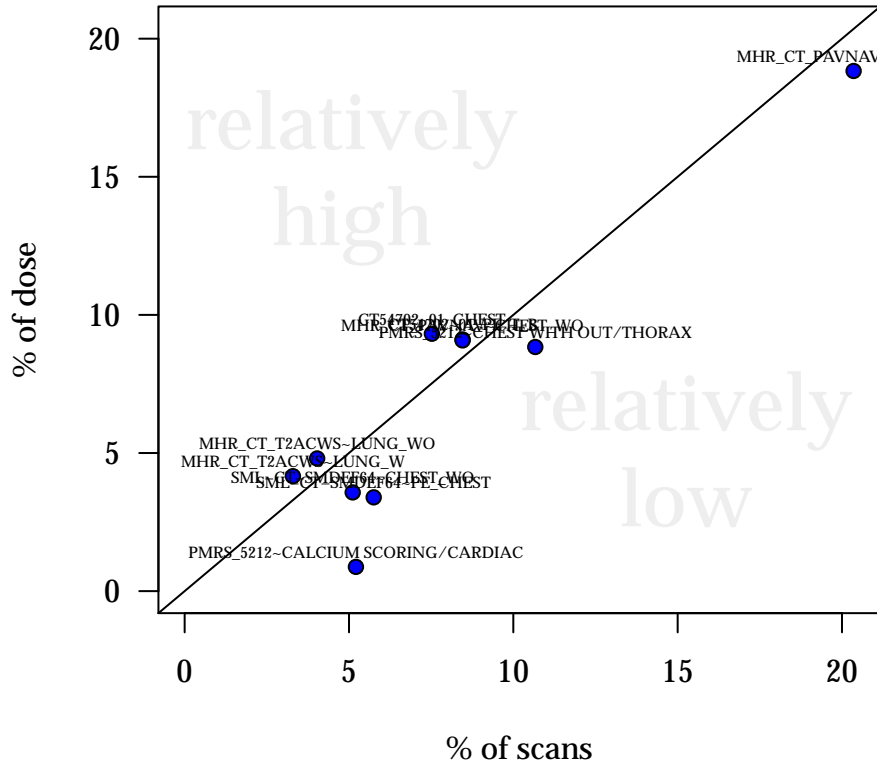

| Machine~Protocol Name             | % scans | % dose | Abs. diff | % diff | ratio |
|-----------------------------------|---------|--------|-----------|--------|-------|
| CT54702~01_CAP                    | 1.6     | 3.9    | 2.3       | 146.8  | 2.5   |
| MHR_CT_T2ACWS~THORACIC_ANGIO      | 1.2     | 3.2    | 2.0       | 170.9  | 2.7   |
| CT54702~01_CHEST                  | 7.5     | 9.3    | 1.8       | 23.9   | 1.2   |
| MHR_CT_T2ACWS~LUNG_W              | 3.3     | 4.2    | 0.9       | 26.4   | 1.3   |
| MHR_CT_T2ACWS~LUNG_WO             | 4.0     | 4.8    | 0.8       | 19.1   | 1.2   |
| CT54702~01_PE_T_B                 | 8.5     | 9.1    | 0.7       | 7.7    | 1.1   |
| MHR_CT_PAVNAV~CHEST_WO            | 8.5     | 9.1    | 0.6       | 7.3    | 1.1   |
| MHR_CT_PAVNAV~PE_CHEST            | 20.4    | 18.8   | -1.5      | -7.5   | 0.9   |
| SML-CT-SMDEF64~CHEST_WO           | 5.1     | 3.6    | -1.5      | -30.1  | 0.7   |
| PMRS_5212~CHEST WITH OUT/THORAX   | 10.7    | 8.8    | -1.8      | -17.1  | 0.8   |
| SML-CT-SMDEF64~PE_CHEST           | 5.8     | 3.4    | -2.4      | -41.0  | 0.6   |
| PMRS_5212~CALCIUM SCORING/CARDIAC | 5.2     | 0.9    | -4.3      | -83.2  | 0.2   |

## D. Doses of your most common protocols compared with those at best performing sites

We have identified the facilities with the lowest doses for each device. This table shows you how the technical parameters within each protocol at your facility compares with the average technical parameters used at facilities with the lowest doses *for that device*. When assessing these data, you must take into account what the indications are for scanning at your facility, as they may differ from other facilities.

In the tables in this section, your most common protocols are labeled by scanner name. The following table shows the name and device types for all scanners at your facility.

| Device Type   | Scanner name   |
|---------------|----------------|
| BRILLIANCE 16 | PMRS_5212      |
| SENSATION 64  | CT54702        |
| SOM DEF       | MHR_CT_T2ACWS  |
| SOM DEF AS    | MHR_CT_PAVNAV  |
| SOM DEF AS    | SML-CT-SMDEF64 |

| Head protocols           | %  | CTDI | DLP | mAs | Phase | Pitch | ScanLen |
|--------------------------|----|------|-----|-----|-------|-------|---------|
| Best sites: SENSATION 64 |    |      |     | 183 | 1     | 0.9   | 16      |
| Best sites: SOM DEF AS   |    |      |     | 143 | 1     | 0.6   | 17      |
| MHR_CT_PAVNAV~BRAIN_WO   | 44 | 44   | 793 | 289 | 1     | 1.0   | 18      |
| CT54702~SPIRAL_BRAIN     | 28 | 41   | 804 | 280 | 1     | 1.0   | 19      |
| SML-CT-SMDEF64~BRAIN_WO  | 13 | 46   | 826 | 163 | 1     | 0.6   | 17      |

| Chest protocols                   | %  | CTDI | DLP | mAs | Phase | Pitch | ScanLen |
|-----------------------------------|----|------|-----|-----|-------|-------|---------|
| Best sites: BRILLIANCE 16         |    |      |     | 113 | 1.1   | 0.9   | 26      |
| Best sites: SENSATION 64          |    |      |     | 228 | 1.5   | 1.1   | 34      |
| Best sites: SOM DEF AS            |    |      |     | 137 | 1.2   | 0.9   | 33      |
| Best sites: SOM DEF AS            |    |      |     | 85  | 1.1   | 0.7   | 32      |
| Best sites: SOM DEF               |    |      |     | 104 | 1.6   | 0.9   | 28      |
| MHR_CT_PAVNAV~PE_CHEST            | 20 | 14   | 464 | 155 | 1.0   | 0.9   | 31      |
| PMRS_5212~CHEST WITH OUT/THORAX   | 11 | 12   | 394 | 171 | 1.0   | 1.0   | 33      |
| MHR_CT_PAVNAV~CHEST_WO            | 8  | 15   | 508 | 184 | 1.0   | 1.0   | 33      |
| CT54702~01_PE_T_B                 | 8  | 15   | 515 | 183 | 1.0   | 0.9   | 32      |
| CT54702~01_CHEST                  | 8  | 16   | 580 | 165 | 1.0   | 0.7   | 37      |
| SML-CT-SMDEF64~PE_CHEST           | 6  | 9    | 289 | 112 | 1.0   | 0.9   | 33      |
| PMRS_5212~CALCIUM SCORING/CARDIAC | 5  | 6    | 87  | 100 | 1.0   | 1.0   | 14      |
| SML-CT-SMDEF64~CHEST_WO           | 5  | 8    | 308 | 167 | 1.0   | 1.0   | 35      |
| MHR_CT_T2ACWS~LUNG_WO             | 4  | 16   | 599 | 195 | 1.0   | 0.8   | 36      |

| Abdomen protocols        | %  | CTDI | DLP | mAs | Phase | Pitch | ScanLen |
|--------------------------|----|------|-----|-----|-------|-------|---------|
| Best sites: SENSATION 64 |    |      |     | 191 | 1.9   | 1.0   | 43      |
| Best sites: SOM DEF AS   |    |      |     | 153 | 1.6   | 0.8   | 46      |
| Best sites: SOM DEF AS   |    |      |     | 137 | 1.6   | 0.7   | 38      |
| Best sites: SOM DEF      |    |      |     | 108 | 1.3   | 0.8   | 39      |
| MHR_CT_PAVNAV~ABD_PEL_WO | 32 | 13   | 620 | 216 | 1.0   | 1.5   | 47      |
| CT54702~01_ABDPEL_WO     | 20 | 12   | 606 | 130 | 1.0   | 0.7   | 49      |



---

| Abdomen protocols           | % | CTDI | DLP | mAs | Phase | Pitch | ScanLen |
|-----------------------------|---|------|-----|-----|-------|-------|---------|
| SML-CT-SMDEF64~ABD_PEL_WO   | 8 | 10   | 486 | 178 | 1.0   | 0.8   | 48      |
| MHR_CT_PAVNAV~ABD_PEL_WITH  | 7 | 12   | 586 | 217 | 1.0   | 1.5   | 48      |
| SML-CT-SMDEF64~ABD_PEL_WITH | 7 | 9    | 422 | 94  | 1.0   | 0.8   | 47      |
| MHR_CT_T2ACWS~ABD_PEL_WITH  | 3 | 18   | 871 | 209 | 1.0   | 0.7   | 48      |

---

## E. Patients who received the highest doses at your facility

Reviewing individual patients who received the highest doses at your facility is a way to identify possible quality issues. The lists on these pages identify those patients within the audit period who received the highest doses. You can search within your database using the information we have provided to identify these patients.

The 95th percentile doses for CTDIvol across all patients and facilities is 62 mGy for the head, 22 mGy for the chest, and 26 mGy for the abdomen. At your facility, there were 34 patients who received a head dose above 62 mGy.

There were 163 patients who received a chest dose above 22 mGy.

There were 139 patients who received an abdomen dose above 26 mGy.

Table 57: Patients receiving highest doses for HEAD

| EffDose | CTDIvol | DLP  | mAs | Phase | ScanLen | Machine        | Date       | Time     | Age | Sex |
|---------|---------|------|-----|-------|---------|----------------|------------|----------|-----|-----|
| 47      | 63      | 4390 | 219 | 4     | 17      | SML-CT-SMDEF64 | 2016-12-02 | 21:19:11 | 34  | M   |
| 9       | 68      | 2857 | 258 | 3     | 14      | MHR_CT_PAVNAV  | 2017-01-02 | 15:33:46 | 41  | M   |
| 8       | 58      | 3049 | 248 | 3     | 17      | SML-CT-SMDEF64 | 2017-01-11 | 15:14:50 | 90  | F   |
| 8       | 34      | 2103 | 181 | 2     | 15      | MHR_CT_PAVNAV  | 2017-01-15 | 2:47:28. | 96  | F   |
| 7       | 44      | 2433 | 290 | 2     | 19      | MHR_CT_PAVNAV  | 2017-02-12 | 12:27:59 | 18  | M   |
| 6       | 25      | 1720 | 319 | 1     | 23      | MHR_CT_PAVNAV  | 2017-03-05 | 13:05:41 | 93  | M   |
| 6       | 46      | 2147 | 299 | 3     | 15      | MHR_CT_PAVNAV  | 2017-02-06 | 20:26:45 | 64  | M   |
| 6       | 77      | 2031 | 152 | 1     | 26      | SML-CT-SMDEF64 | 2016-12-23 | 3:42:13. | 73  | F   |
| 6       | 33      | 1686 | 223 | 2     | 17      | MHR_CT_PAVNAV  | 2017-01-23 | 12:01:49 | 64  | F   |
| 6       | 56      | 2335 | 333 | 2     | 21      | CT54702        | 2017-03-06 | 9:21:07. | 96  | F   |
| 6       | 33      | 1879 | 290 | 1     | 19      | MHR_CT_PAVNAV  | 2016-12-23 | 21:37:45 | 74  | M   |
| 6       | 65      | 2339 | 407 | 2     | 18      | MHR_CT_PAVNAV  | 2016-12-18 | 6:05:41. | 24  | F   |
| 6       | 73      | 1902 | 263 | 1     | 26      | MHR_CT_PAVNAV  | 2017-01-07 | 6:34:33. | 21  | F   |
| 6       | 46      | 1944 | 205 | 2     | 21      | MHR_CT_T2ACWS  | 2017-01-05 | 10:32:28 | 69  | M   |
| 6       | 62      | 2297 | 224 | 3     | 12      | SML-CT-SMDEF64 | 2017-02-04 | 18:27:33 | 47  | M   |
| 5       | 20      | 1704 | 196 | 2     | 21      | MHR_CT_PAVNAV  | 2017-01-28 | 18:47:42 | 33  | F   |
| 5       | 29      | 1815 | 249 | 1     | 21      | MHR_CT_PAVNAV  | 2017-01-21 | 13:05:35 | 28  | F   |
| 5       | 64      | 2031 | 226 | 2     | 16      | MHR_CT_PAVNAV  | 2017-01-15 | 16:42:16 | 61  | F   |
| 5       | 53      | 1986 | 235 | 2     | 19      | SML-CT-SMDEF64 | 2017-02-20 | 17:11:05 | 26  | M   |
| 5       | 28      | 1302 | 243 | 1     | 23      | MHR_CT_PAVNAV  | 2017-01-03 | 18:40:23 | 93  | F   |
| 5       | 32      | 1396 | 300 | 1     | 22      | MHR_CT_PAVNAV  | 2017-01-09 | 13:27:27 | 54  | M   |
| 5       | 43      | 1661 | 147 | 2     | 19      | MHR_CT_PAVNAV  | 2017-02-16 | 20:11:06 | 49  | M   |
| 5       | 28      | 1643 | 250 | 1     | 19      | MHR_CT_PAVNAV  | 2016-12-26 | 2:03:15. | 30  | M   |
| 5       | 42      | 2223 | 341 | 3     | 18      | MHR_CT_PAVNAV  | 2016-12-18 | 10:26:30 | 51  | M   |
| 5       | 108     | 1948 | 367 | 1     | 18      | MHR_CT_PAVNAV  | 2016-12-03 | 2:36:29. | 85  | F   |

Table 58: Patients receiving highest doses for CHEST

| EffDose | CTDIvol | DLP  | mAs | Phase | ScanLen | Machine       | Date       | Time     | Age | Sex |
|---------|---------|------|-----|-------|---------|---------------|------------|----------|-----|-----|
| 50      | 21      | 2372 | 229 | 3     | 37      | MHR_CT_T2ACWS | 2016-12-14 | 8:39:31. | 69  | F   |
| 45      | 19      | 2112 | 274 | 4     | 27      | MHR_CT_PAVNAV | 2016-12-01 | 12:01:43 | 61  | F   |
| 41      | 18      | 2695 | 246 | 3     | 50      | CT54702       | 2017-01-10 | 15:02:37 | 89  | M   |
| 39      | 23      | 1840 | 241 | 2     | 41      | CT54702       | 2017-02-28 | 17:04:43 | 80  | F   |
| 39      | 44      | 2916 | 250 | 3     | 22      | MHR_CT_T2ACWS | 2016-12-29 | 15:14:28 | 64  | M   |
| 38      | 41      | 2069 | 310 | 2     | 25      | MHR_CT_T2ACWS | 2016-12-13 | 9:57:01. | 81  | M   |
| 36      | 25      | 2162 | 290 | 2     | 43      | CT54702       | 2016-12-01 | 12:07:17 | 34  | F   |
| 35      | 27      | 1791 | 296 | 2     | 33      | MHR_CT_T2ACWS | 2016-12-23 | 10:04:33 | 68  | F   |
| 33      | 20      | 1709 | 236 | 2     | 42      | CT54702       | 2017-02-12 | 17:14:17 | 38  | F   |
| 33      | 25      | 2355 | 287 | 2     | 47      | MHR_CT_PAVNAV | 2017-03-11 | 15:03:28 | 56  | M   |
| 33      | 20      | 1791 | 274 | 2     | 45      | CT54702       | 2017-01-28 | 16:21:59 | 57  | F   |
| 33      | 17      | 1494 | 272 | 2     | 43      | CT54702       | 2016-12-03 | 17:39:50 | 34  | F   |
| 32      | 17      | 1271 | 239 | 2     | 38      | CT54702       | 2016-12-09 | 17:37:32 | 88  | F   |
| 32      | 19      | 1356 | 261 | 2     | 36      | MHR_CT_PAVNAV | 2017-01-31 | 19:00:47 | 25  | F   |
| 31      | 15      | 1251 | 237 | 2     | 41      | CT54702       | 2017-03-12 | 18:11:03 | 67  | F   |
| 31      | 17      | 1134 | 175 | 2     | 34      | MHR_CT_T2ACWS | 2016-12-22 | 14:00:31 | 68  | F   |
| 31      | 31      | 2186 | 224 | 2     | 35      | MHR_CT_PAVNAV | 2016-12-31 | 23:49:23 | 47  | F   |
| 30      | 18      | 1295 | 189 | 2     | 36      | MHR_CT_T2ACWS | 2017-01-19 | 10:52:12 | 73  | F   |
| 30      | 20      | 1769 | 277 | 2     | 45      | MHR_CT_PAVNAV | 2016-12-16 | 4:42:19. | 52  | M   |
| 30      | 19      | 1952 | 188 | 2     | 53      | MHR_CT_T2ACWS | 2016-12-16 | 8:31:06. | 58  | M   |
| 30      | 13      | 1261 | 283 | 3     | 33      | MHR_CT_T2ACWS | 2017-02-07 | 11:32:24 | 74  | F   |
| 30      | 15      | 1204 | 248 | 2     | 40      | CT54702       | 2017-01-21 | 9:28:01. | 43  | F   |
| 30      | 24      | 1499 | 253 | 2     | 32      | MHR_CT_T2ACWS | 2017-03-17 | 11:11:05 | 73  | F   |
| 30      | 27      | 1986 | 225 | 2     | 36      | MHR_CT_T2ACWS | 2017-02-07 | 14:54:52 | 68  | M   |
| 30      | 19      | 1398 | 220 | 2     | 37      | MHR_CT_T2ACWS | 2017-01-06 | 12:04:21 | 72  | F   |

Table 59: Patients receiving highest doses for ABDOMEN

| EffDose | CTDIvol | DLP  | mAs | Phase | ScanLen | Machine       | Date       | Time     | Age | Sex |
|---------|---------|------|-----|-------|---------|---------------|------------|----------|-----|-----|
| 65      | 39      | 4329 | 268 | 3     | 37      | MHR_CT_T2ACWS | 2017-02-10 | 7:58:16. | 65  | M   |
| 62      | 32      | 4409 | 233 | 4     | 35      | MHR_CT_PAVNAV | 2017-02-17 | 15:21:02 | 72  | F   |
| 53      | 23      | 3272 | 261 | 4     | 35      | MHR_CT_T2ACWS | 2017-01-31 | 10:12:31 | 60  | F   |
| 52      | 24      | 2901 | 268 | 4     | 30      | MHR_CT_T2ACWS | 2017-01-18 | 9:41:49. | 77  | F   |
| 52      | 21      | 3365 | 221 | 3     | 53      | MHR_CT_T2ACWS | 2017-02-14 | 10:58:24 | 48  | F   |
| 51      | 28      | 3470 | 319 | 4     | 31      | MHR_CT_T2ACWS | 2017-01-26 | 8:51:43. | 60  | F   |
| 50      | 38      | 3769 | 276 | 3     | 33      | MHR_CT_T2ACWS | 2016-12-30 | 11:32:58 | 73  | F   |
| 50      | 15      | 2171 | 160 | 4     | 37      | MHR_CT_T2ACWS | 2017-02-13 | 13:55:19 | 60  | F   |
| 49      | 25      | 2988 | 279 | 4     | 30      | MHR_CT_T2ACWS | 2017-01-16 | 13:57:17 | 48  | F   |
| 49      | 36      | 3250 | 245 | 3     | 30      | MHR_CT_T2ACWS | 2017-02-06 | 16:29:59 | 70  | F   |
| 48      | 26      | 3663 | 211 | 3     | 47      | MHR_CT_T2ACWS | 2017-01-03 | 12:59:09 | 68  | M   |
| 47      | 23      | 3703 | 201 | 3     | 53      | MHR_CT_T2ACWS | 2017-02-23 | 15:01:17 | 49  | F   |
| 47      | 21      | 3250 | 235 | 4     | 39      | MHR_CT_T2ACWS | 2017-02-21 | 10:02:25 | 56  | M   |
| 46      | 21      | 3538 | 207 | 4     | 42      | CT54702       | 2017-02-25 | 12:42:29 | 93  | M   |
| 45      | 35      | 3315 | 238 | 2     | 48      | MHR_CT_PAVNAV | 2017-01-19 | 14:24:22 | 63  | F   |
| 44      | 18      | 2322 | 197 | 4     | 33      | MHR_CT_T2ACWS | 2016-12-05 | 11:17:00 | 78  | F   |
| 44      | 16      | 2588 | 202 | 3     | 53      | MHR_CT_T2ACWS | 2017-02-07 | 12:16:17 | 65  | M   |
| 43      | 29      | 2838 | 278 | 2     | 48      | MHR_CT_T2ACWS | 2017-03-17 | 15:05:28 | 66  | M   |
| 43      | 15      | 1891 | 161 | 4     | 32      | MHR_CT_T2ACWS | 2017-03-16 | 15:28:04 | 60  | F   |
| 41      | 15      | 2233 | 183 | 3     | 51      | MHR_CT_T2ACWS | 2017-02-02 | 10:24:02 | 49  | F   |
| 41      | 14      | 1980 | 180 | 3     | 46      | MHR_CT_T2ACWS | 2017-02-13 | 14:31:39 | 68  | F   |
| 41      | 19      | 2861 | 311 | 3     | 49      | PMRS_5212     | 2016-12-13 | 13:16:44 | 71  | M   |
| 41      | 14      | 1960 | 178 | 3     | 47      | MHR_CT_T2ACWS | 2016-12-28 | 13:54:53 | 54  | F   |
| 40      | 12      | 1743 | 161 | 3     | 47      | MHR_CT_T2ACWS | 2017-03-17 | 11:29:04 | 62  | F   |
| 40      | 12      | 1734 | 162 | 3     | 47      | MHR_CT_T2ACWS | 2016-12-19 | 11:48:53 | 21  | F   |

## F. Effect of changing specific parameters on doses received by your patients

We have identified for each type of equipment those facilities with the lowest doses. These graphs are meant to help you understand what would happen to the protocol-specific doses at your facilities if you copied the technical parameters and protocols of the facilities with the lowest doses.

The following plots show the average settings for mAs, phase, pitch, and scan length for a particular machine at your facility along with the settings for other facilities using the same model of machine for the same anatomical region. Each machine of a certain model type at your facility is indicated in blue; all other machines of that same model type at other facilities are in grey. If you have two machines of the same model, you will see two blue dots showing the average settings for each one. The green dot shows the average value for the setting for the same model type at “best performing” facilities. That is, we look at the doses for the same anatomical region across all facilities that have the same device as you, and then we calculated the average settings for mAs, pitch, and so on for the low dose facilities. That is the green dot.

If your device is a common one, you will see many comparisons; if your device is rare or unusual, you will see very few comparisons. If your machine is the only one of its type, there will be no other comparisons.

Reducing mAs, phases, and/or scan length reduce dose, while increasing pitch reduces dose, so the plots show pitch with the sign reversed. Lower doses will tend to be in the lower left corner of each panel while higher doses will tend to be in the upper right corner.

### G. Chest-Abdomen-Pelvis (CAP) frequency

We have identified the proportion of examinations that combine chest and abdomen/pelvis (CAP) scans for each facility. This graph below is sorted by how often a facility uses CAP scans. Facilities on the left use CAP more frequently, whereas facilities on the right use these combined scans less frequently. Your facility is indicated at the top of the graph. Within each slice, the bars sum to 100%.

The following table ranks the 39 facilities in your track according to percentage of scans that were combined CAP scans. At your facility, CAP scans comprised 4 percent of all scans.

Proportion of CAP scans

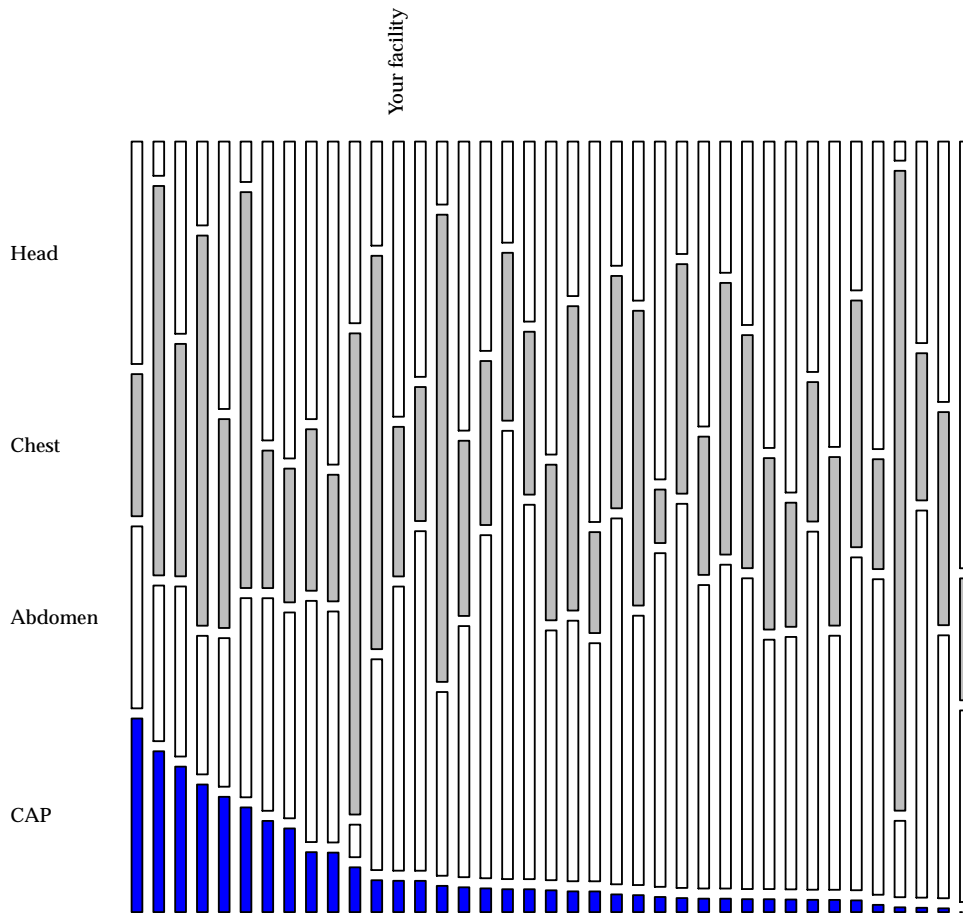

Table 85: Patients who received highest doses for CAP

| EffDose | CTDIvol | DLP  | mAs | Phase | ScanLen | Machine       | Date       | Time     | Age | Sex |
|---------|---------|------|-----|-------|---------|---------------|------------|----------|-----|-----|
| 83      | 41      | 4090 | 302 | 1     | 34      | MHR_CT_T2ACWS | 2017-02-09 | 11:17:33 | 40  | M   |
| 73      | 23      | 3748 | 219 | 2     | 40      | MHR_CT_T2ACWS | 2017-03-20 | 15:35:39 | 65  | F   |
| 70      | 19      | 2962 | 233 | 2     | 38      | MHR_CT_T2ACWS | 2017-03-07 | 10:03:50 | 80  | F   |
| 58      | 21      | 3318 | 251 | 2     | 40      | MHR_CT_T2ACWS | 2017-03-06 | 14:13:03 | 92  | M   |
| 58      | 15      | 2173 | 221 | 4     | 37      | MHR_CT_T2ACWS | 2017-03-13 | 16:57:34 | 85  | F   |
| 56      | 25      | 4393 | 278 | 1     | 43      | MHR_CT_T2ACWS | 2017-03-02 | 9:11:25. | 86  | M   |
| 55      | 20      | 2207 | 230 | 1     | 37      | MHR_CT_T2ACWS | 2017-01-12 | 9:34:38. | 71  | F   |
| 54      | 23      | 3486 | 273 | 1     | 30      | MHR_CT_T2ACWS | 2017-02-09 | 13:56:30 | 74  | M   |
| 54      | 22      | 2577 | 231 | 1     | 39      | MHR_CT_T2ACWS | 2017-01-25 | 14:11:23 | 70  | F   |
| 53      | 21      | 2749 | 233 | 1     | 44      | MHR_CT_T2ACWS | 2017-01-30 | 11:46:55 | 68  | M   |
| 52      | 15      | 2173 | 279 | 4     | 37      | MHR_CT_T2ACWS | 2017-03-13 | 16:47:46 | 85  | F   |
| 52      | 19      | 2339 | 217 | 2     | 42      | MHR_CT_T2ACWS | 2017-01-30 | 14:33:13 | 58  | F   |
| 49      | 29      | 2271 | 278 | 1     | 39      | MHR_CT_T2ACWS | 2017-02-23 | 10:20:38 | 52  | F   |
| 49      | 27      | 3527 | 254 | 3     | 33      | MHR_CT_T2ACWS | 2016-12-27 | 17:19:21 | 76  | M   |
| 48      | 28      | 2145 | 231 | 1     | 38      | MHR_CT_T2ACWS | 2016-12-30 | 15:36:19 | 51  | F   |
| 47      | 22      | 2293 | 210 | 2     | 34      | MHR_CT_T2ACWS | 2017-01-31 | 18:14:37 | 33  | F   |
| 46      | 22      | 1884 | 269 | 1     | 43      | MHR_CT_T2ACWS | 2016-12-13 | 9:24:57. | 45  | F   |
| 45      | 19      | 2322 | 231 | 3     | 40      | MHR_CT_T2ACWS | 2016-12-13 | 13:29:12 | 82  | F   |
| 45      | 22      | 1743 | 261 | 1     | 40      | MHR_CT_T2ACWS | 2017-02-21 | 9:42:22. | 70  | F   |
| 45      | 30      | 2225 | 308 | 1     | 37      | MHR_CT_T2ACWS | 2017-02-23 | 15:50:29 | 57  | F   |
| 45      | 23      | 1892 | 283 | 1     | 41      | MHR_CT_T2ACWS | 2017-01-20 | 15:59:22 | 69  | F   |
| 45      | 17      | 2024 | 198 | 2     | 39      | MHR_CT_T2ACWS | 2016-12-01 | 18:06:22 | 44  | F   |
| 44      | 21      | 1870 | 260 | 1     | 44      | MHR_CT_T2ACWS | 2017-01-04 | 9:30:36. | 75  | F   |
| 44      | 21      | 2481 | 248 | 1     | 40      | MHR_CT_T2ACWS | 2016-12-13 | 12:04:58 | 66  | M   |
| 44      | 21      | 2485 | 239 | 2     | 40      | MHR_CT_T2ACWS | 2017-02-16 | 16:54:48 | 59  | F   |

## **Selected Pages From Audit Shown**



**A.2 List of All Protocols by Anatomic Region  
Frequency Order  
ABDOMEN**

| <b>Protocol Name</b>            | <b>Count of Scans</b> | <b>Percent of Scans</b> | <b>Effective Dose (mSv)</b> | <b>Scan Length (cm)</b> | <b>KVP</b> | <b>mAs</b> | <b>Pitch</b> | <b>Phase Count</b> | <b>Rank for Variable COUNT</b> |
|---------------------------------|-----------------------|-------------------------|-----------------------------|-------------------------|------------|------------|--------------|--------------------|--------------------------------|
| ABD_PEL_WO                      | 5382                  | 42.92                   | 11.1                        | 48                      | 123        | 208        | 1.2          | 1.0                | 1                              |
| ABD_PEL_WITH                    | 2197                  | 17.52                   | 10.6                        | 49                      | 123        | 167        | 1.1          | 1.1                | 2                              |
| 01_ABDPEL_WO                    | 2094                  | 16.70                   | 11.0                        | 49                      | 120        | 144        | 0.7          | 1.0                | 3                              |
| 01_ABDPEL_WITH                  | 493                   | 3.93                    | 10.7                        | 50                      | 120        | 137        | 0.7          | 1.0                | 4                              |
| ABD_PEL_COMP                    | 268                   | 2.14                    | 21.0                        | 76                      | 115        | 203        | 0.7          | 2.0                | 5                              |
| UROGRAM                         | 203                   | 1.62                    | 32.1                        | 127                     | 120        | 182        | 0.8          | 3.0                | 6                              |
| PELVIS_                         | 171                   | 1.36                    | 5.2                         | 32                      | 113        | 159        | 0.8          | 1.1                | 7                              |
| ABDOMEN ROUTINE W/O/ABDOMEN     | 134                   | 1.07                    | 10.4                        | 45                      | 120        | 250        | 1.0          | 1.0                | 8                              |
| PEDS_ABD_PEL_WO                 | 93                    | 0.74                    | 2.3                         | 35                      | 97         | 61         | 1.0          | 1.0                | 9                              |
| TRIPLE_PHASE_LIVER              | 86                    | 0.69                    | 33.6                        | 120                     | 116        | 203        | 0.7          | 4.0                | 10                             |
| 01_PELVIS                       | 84                    | 0.67                    | 5.5                         | 32                      | 121        | 121        | 0.7          | 1.0                | 11                             |
| 01_CAP                          | 83                    | 0.66                    | 14.6                        | 53                      | 120        | 174        | 0.7          | 1.1                | 13                             |
| CT_UROGRAM                      | 83                    | 0.66                    | 19.4                        | 140                     | 103        | 164        | 0.9          | 3.0                | 13                             |
| PANCREAS_PROTOCOL               | 66                    | 0.53                    | 15.4                        | 101                     | 104        | 152        | 0.8          | 3.0                | 14                             |
| PELVIS_FX                       | 58                    | 0.46                    | 4.1                         | 34                      | 111        | 111        | 0.8          | 1.0                | 15                             |
| ABD/PELV ROUTINE WO & W/ABDOMEN | 57                    | 0.45                    | 25.5                        | 105                     | 120        | 259        | 1.0          | 2.3                | 16                             |
| CAP_W_TRAUMA                    | 52                    | 0.41                    | 12.8                        | 49                      | 128        | 228        | 1.3          | 1.1                | 17                             |
| 3_PHASE_LIVER                   | 51                    | 0.41                    | 16.1                        | 124                     | 102        | 143        | 0.8          | 4.0                | 18                             |
| ABD_PEL_COMPLETE                | 48                    | 0.38                    | 13.4                        | 83                      | 121        | 124        | 0.9          | 2.1                | 20                             |
| CTA_ABD                         | 48                    | 0.38                    | 31.9                        | 108                     | 119        | 199        | 0.8          | 2.8                | 20                             |
| PANC_PROTOCOL                   | 46                    | 0.37                    | 31.6                        | 101                     | 117        | 203        | 0.7          | 3.0                | 21                             |
| ABDOMEN/PELVIS WITH/ABDOMEN     | 45                    | 0.36                    | 13.3                        | 55                      | 120        | 260        | 1.0          | 1.3                | 22                             |
| TRAUMA_HEAD_C_SPINE             | 40                    | 0.32                    | 15.8                        | 58                      | 128        | 228        | 1.2          | 1.8                | 23                             |

**A.2 List of All Protocols by Anatomic Region**  
**Frequency Order**  
**CHEST**

| Protocol Name              | Count of Scans | Percent of Scans | Effective Dose (mSv) | Scan Length (cm) | KVP | mAs | Pitch | Phase Count | Rank for Variable COUNT |
|----------------------------|----------------|------------------|----------------------|------------------|-----|-----|-------|-------------|-------------------------|
| PE_CHEST                   | 1516           | 25.02            | 8.1                  | 34               | 116 | 144 | 0.9   | 1.2         | 1                       |
| CHEST_WO                   | 824            | 13.60            | 8.6                  | 34               | 117 | 180 | 1.0   | 1.0         | 2                       |
| CHEST WITH OUT/THORAX      | 626            | 10.33            | 8.5                  | 33               | 120 | 233 | 1.0   | 1.0         | 3                       |
| 01_CHEST                   | 431            | 7.11             | 12.1                 | 40               | 120 | 175 | 0.7   | 1.1         | 4                       |
| 01_PE_T_B                  | 419            | 6.92             | 11.3                 | 36               | 120 | 184 | 0.9   | 1.1         | 5                       |
| CALCIUM SCORING/CARDIAC    | 355            | 5.86             | 2.1                  | 13               | 120 | 104 | 1.0   | 1.0         | 6                       |
| LUNG_WO                    | 280            | 4.62             | 11.0                 | 37               | 116 | 190 | 0.8   | 1.0         | 7                       |
| LUNG_W                     | 228            | 3.76             | 11.9                 | 37               | 117 | 199 | 0.8   | 1.0         | 8                       |
| CHEST_W                    | 203            | 3.35             | 8.7                  | 38               | 115 | 174 | 1.0   | 1.1         | 9                       |
| MH HRCT SUPINE/THORAX      | 191            | 3.15             | 9.1                  | 44               | 120 | 241 | 1.0   | 1.9         | 10                      |
| HIRES_LUNG                 | 109            | 1.80             | 11.6                 | 44               | 120 | 311 | 1.4   | 1.5         | 11                      |
| PE_STUDY_1                 | 85             | 1.40             | 13.6                 | 35               | 118 | 203 | 0.8   | 1.3         | 12                      |
| 01_CAP                     | 81             | 1.34             | 22.1                 | 76               | 120 | 234 | 0.9   | 1.8         | 13                      |
| THORACIC_ANGIO             | 74             | 1.22             | 25.5                 | 72               | 120 | 209 | 0.7   | 2.0         | 14                      |
| LUNG SCREENING/THORAX      | 72             | 1.19             | 1.5                  | 35               | 120 | 183 | 1.0   | 1.0         | 15                      |
| HR_LUNG                    | 60             | 0.99             | 16.0                 | 59               | 128 | 176 | 1.0   | 1.9         | 16                      |
| CHEST WITH CONTRAST/THORAX | 56             | 0.92             | 9.6                  | 35               | 120 | 232 | 1.0   | 1.0         | 17                      |
| 01_PE_CHEST_ACR            | 55             | 0.91             | 10.3                 | 33               | 120 | 188 | 0.9   | 1.0         | 18                      |
| THOR_ANGIO                 | 51             | 0.84             | 14.8                 | 76               | 113 | 130 | 0.8   | 2.1         | 19                      |
| TRAUMA_HEAD_C_SPINE        | 47             | 0.78             | 17.5                 | 51               | 131 | 238 | 1.3   | 1.7         | 20                      |
| 01_HIRES_LUNG              | 38             | 0.63             | 12.1                 | 56               | 120 | 139 | 0.8   | 2.1         | 21                      |
| CAP_W_TRAUMA               | 30             | 0.50             | 16.6                 | 52               | 138 | 243 | 1.3   | 1.3         | 23                      |
| CTA_HEART_SPIRAL           | 30             | 0.50             | 10.2                 | 23               | 118 | 211 | 0.9   | 1.3         | 23                      |

**A.2 List of All Protocols by Anatomic Region  
Frequency Order  
HEAD**

| Protocol Name               | Count of Scans | Percent of Scans | Effective Dose (mSv) | Scan Length (cm) | KVP | mAs | Pitch | Phase Count | Rank for Variable COUNT |
|-----------------------------|----------------|------------------|----------------------|------------------|-----|-----|-------|-------------|-------------------------|
| BRAIN_WO                    | 6755           | 57.06            | 2.1                  | 20               | 119 | 261 | 0.9   | 1.0         | 1                       |
| SPIRAL_BRAIN                | 2952           | 24.94            | 2.0                  | 20               | 120 | 283 | 1.0   | 1.0         | 2                       |
| SPIRAL_BRAIN_WO             | 284            | 2.40             | 1.9                  | 18               | 120 | 156 | 0.6   | 1.1         | 3                       |
| 01_FACIAL_BONES             | 218            | 1.84             | 1.1                  | 20               | 120 | 106 | 0.9   | 1.1         | 4                       |
| FACIAL_BONES                | 209            | 1.77             | 1.4                  | 19               | 105 | 121 | 0.8   | 1.0         | 5                       |
| PEDS_HEAD_SPIRAL            | 192            | 1.62             | 1.9                  | 18               | 100 | 194 | 0.8   | 1.2         | 6                       |
| MH BRAIN HELICAL/HEAD       | 162            | 1.37             | 2.0                  | 18               | 120 | 316 | 1.0   | 1.0         | 7                       |
| SINUS                       | 122            | 1.03             | 0.5                  | 14               | 107 | 90  | 0.8   | 1.1         | 8                       |
| TRAUMA_HEAD_C_SPINE         | 107            | 0.90             | 2.9                  | 28               | 117 | 187 | 0.7   | 1.6         | 9                       |
| MH SINUS/FACIAL SUPINE/HEAD | 76             | 0.64             | 0.5                  | 14               | 120 | 103 | 1.0   | 1.0         | 10                      |
| COW_CTA                     | 72             | 0.61             | 2.8                  | 31               | 107 | 209 | 0.7   | 1.2         | 11                      |
| CAROTID_COW_CTA             | 58             | 0.49             | 2.6                  | 28               | 112 | 196 | 0.7   | 1.2         | 12                      |
| BRAIN HELICAL/HEAD          | 52             | 0.44             | 2.3                  | 19               | 120 | 300 | 1.0   | 1.0         | 13                      |
| IAC                         | 48             | 0.41             | 0.9                  | 8                | 107 | 211 | 0.8   | 1.0         | 14                      |
| COW                         | 47             | 0.40             | 3.9                  | 37               | 120 | 181 | 0.7   | 2.0         | 15                      |
| STROKE                      | 43             | 0.36             | 2.5                  | 19               | 116 | 195 | 0.6   | 1.1         | 16                      |
| SINUS SUPINE/HEAD           | 42             | 0.35             | 0.7                  | 15               | 120 | 300 | 1.0   | 1.0         | 17                      |
| SINUS_                      | 37             | 0.31             | 0.5                  | 15               | 100 | 109 | 0.8   | 1.1         | 18                      |
| SPIRAL_BRAIN_COMP           | 34             | 0.29             | 3.7                  | 35               | 120 | 157 | 0.6   | 1.9         | 19                      |
| BRAIN_COMP_WWO              | 29             | 0.24             | 3.7                  | 34               | 119 | 162 | 0.6   | 1.7         | 21                      |
| MH SINUS SUPINE/HEAD        | 29             | 0.24             | 0.6                  | 13               | 120 | 300 | 1.0   | 1.0         | 21                      |
| 01_BRAIN_PERFUSION          | 21             | 0.18             | 0.4                  | 5                | 82  | 361 | 1.0   | 1.0         | 23                      |
| 01_SINUS                    | 21             | 0.18             | 0.5                  | 17               | 119 | 57  | 0.9   | 1.0         | 23                      |

**A.2 List of All Protocols by Anatomic Region  
Frequency Order  
CHEST/ABDOMEN/PELVIS**

| Protocol Name               | Count of Scans | Percent of Scans | Effective Dose (mSv) | Scan Length (cm) | KVP | mAs | Pitch | Phase Count | Rank for Variable COUNT |
|-----------------------------|----------------|------------------|----------------------|------------------|-----|-----|-------|-------------|-------------------------|
| CAP                         | 293            | 22.03            | 34.9                 | 84               | 120 | 244 | 0.8   | 1.2         | 1                       |
| CAP_WITH                    | 252            | 18.95            | 18.7                 | 84               | 121 | 172 | 1.1   | 1.0         | 2                       |
| PE_CHEST                    | 171            | 12.86            | 20.8                 | 85               | 122 | 170 | 1.0   | 1.2         | 3                       |
| CAP_WO                      | 167            | 12.56            | 19.4                 | 82               | 120 | 175 | 1.0   | 1.0         | 4                       |
| CTA_HEART_SPIRAL            | 137            | 10.30            | 19.5                 | 31               | 118 | 185 | 0.6   | 1.3         | 5                       |
| CAP_W_TRAUMA                | 90             | 6.77             | 27.1                 | 91               | 139 | 203 | 1.4   | 1.0         | 6                       |
| ABD_WO                      | 22             | 1.65             | 40.0                 | 118              | 119 | 228 | 0.8   | 1.5         | 7                       |
| CAP_WO/W/THORAX             | 21             | 1.58             | 27.5                 | 95               | 120 | 274 | 1.0   | 1.2         | 9                       |
| CAP_COMP                    | 21             | 1.58             | 33.1                 | 103              | 120 | 255 | 1.0   | 1.3         | 9                       |
| ABD_PEL_WO                  | 19             | 1.43             | 28.3                 | 101              | 120 | 203 | 1.0   | 1.1         | 10                      |
| CHEST WITH OUT/THORAX       | 17             | 1.28             | 17.0                 | 78               | 120 | 235 | 1.0   | 1.0         | 11                      |
| COMPLETE_AORTA_ANGIO        | 16             | 1.20             | 17.8                 | 106              | 109 | 168 | 0.8   | 1.5         | 12                      |
| CAP_COMPLETE                | 15             | 1.13             | 24.7                 | 111              | 124 | 173 | 1.2   | 1.5         | 13                      |
| CHEST_WO                    | 11             | 0.83             | 20.9                 | 86               | 121 | 183 | 1.0   | 1.1         | 14                      |
| HIRES_LUNG                  | 8              | 0.60             | 28.3                 | 85               | 126 | 304 | 1.3   | 1.0         | 16                      |
| THOR_ANGIO                  | 8              | 0.60             | 24.6                 | 116              | 118 | 159 | 0.8   | 1.6         | 16                      |
| CHEST_W                     | 7              | 0.53             | 18.7                 | 120              | 112 | 177 | 1.1   | 2.4         | 18                      |
| TRAUMA_HEAD_C_SPINE         | 7              | 0.53             | 35.3                 | 91               | 133 | 244 | 1.3   | 1.3         | 18                      |
| ABDOMEN ROUTINE W/O/ABDOMEN | 6              | 0.45             | 17.8                 | 79               | 120 | 235 | 1.0   | 1.0         | 19                      |
| HR_LUNG                     | 3              | 0.23             | 41.5                 | 109              | 125 | 244 | 0.9   | 1.7         | 21                      |
| PANC_PROTOCOL               | 3              | 0.23             | 33.7                 | 134              | 115 | 211 | 0.8   | 1.0         | 21                      |
| PE_STUDY_1                  | 3              | 0.23             | 21.8                 | 80               | 113 | 197 | 0.8   | 1.0         | 21                      |
| 01_CAP                      | 2              | 0.15             | 17.7                 | 86               | 120 | 121 | 0.8   | 1.0         | 26                      |

**A.1: Protocol Rankings for: PULMONARY EMBOLISM**

| Facility  | Device Model | Protocol Name   | Rank<br>Effec<br>Dose | Effec<br>Dose | Scan<br>Length | KVP | mAs | Pitch | Phase |
|-----------|--------------|-----------------|-----------------------|---------------|----------------|-----|-----|-------|-------|
| Lowest    |              |                 | 1                     | 2.0           | 38             | 88  | 239 | 1.8   | 1.0   |
| Low 2     |              |                 | 2                     | 2.1           | 32             | 85  | 97  | 0.6   | 1.0   |
| Low 3     |              |                 | 3                     | 2.2           | 34             | 100 | 129 | 1.5   | 1.0   |
| Low 4     |              |                 | 4                     | 2.2           | 34             | 103 | 108 | 1.4   | 1.0   |
| Low 5     |              |                 | 5                     | 2.9           | 37             | 100 | 237 | 1.8   | 1.0   |
| Top 5 Avg | mixture      | mixture         | .                     | 2.3           | 35             | 95  | 162 | 1.4   | 1.0   |
| You       | SOM DEF AS   | PE_CHEST        | 63                    | 8.2           | 34             | 116 | 144 | 0.9   | 1.2   |
| You       | SOM DEF AS   | PE_CHEST_ACR    | 67                    | 8.3           | 32             | 112 | 204 | 0.9   | 1.2   |
| You       | SENSATION 64 | 01_PE_CHEST_ACR | 95                    | 10.4          | 33             | 120 | 190 | 0.9   | 1.0   |
| You       | SENSATION 64 | 01_PE_T_B       | 104                   | 11.4          | 36             | 120 | 183 | 0.9   | 1.1   |
| You       | SOM DEF      | PE_STUDY_1      | 127                   | 13.4          | 35             | 118 | 200 | 0.8   | 1.3   |
| Highest   |              |                 | 171                   | 34.2          | 123            | 116 | 212 | 0.8   | 2.9   |

***A.1: Protocol Rankings for: HEAD SINGLE***

| Facility  | Device Model  | Protocol Name         | Rank<br>Effec<br>Dose | Effec<br>Dose | Scan<br>Length | KVP | mAs | Pitch | Phase |
|-----------|---------------|-----------------------|-----------------------|---------------|----------------|-----|-----|-------|-------|
| Lowest    |               |                       | 1                     | 0.3           | 17             | 117 | 45  | 0.8   | 1.0   |
| Low 2     |               |                       | 2                     | 0.4           | 17             | 80  | 160 | 1.0   | 1.0   |
| Low 3     | SENSATION 64  | 01_BRAIN_PERFUSION    | 3                     | 0.4           | 6              | 82  | 368 | 1.0   | 1.0   |
| Low 4     |               |                       | 4                     | 0.4           | 23             | 120 | 50  | 1.0   | 1.0   |
| Low 5     |               |                       | 5                     | 0.5           | 6              | 90  | 128 | 0.6   | 1.0   |
| Top 5 Avg | mixture       | mixture               | .                     | 0.4           | 14             | 98  | 150 | 0.9   | 1.0   |
| You       | SENSATION 64  | 01_HEAD_SPIRAL        | 43                    | 1.5           | 18             | 120 | 122 | 0.8   | 1.0   |
| You       | SOM DEF AS    | PEDS_HEAD_SPIRAL      | 66                    | 1.7           | 17             | 100 | 193 | 0.8   | 1.0   |
| You       | SOM DEF AS    | PEDS_BRAIN_XC         | 76                    | 1.8           | 16             | 100 | 158 | 0.6   | 1.0   |
| You       | SOM DEF       | SPIRAL_BRAIN_WO       | 82                    | 1.9           | 18             | 120 | 157 | 0.6   | 1.0   |
| You       | SENSATION 64  | SPIRAL_BRAIN          | 97                    | 2.0           | 19             | 120 | 283 | 1.0   | 1.0   |
| You       | BRILLIANCE 16 | MH BRAIN HELICAL/HEAD | 102                   | 2.0           | 18             | 120 | 317 | 1.0   | 1.0   |
| You       | SOM DEF AS    | BRAIN_WO              | 111                   | 2.1           | 19             | 119 | 261 | 0.9   | 1.0   |
| You       | BRILLIANCE 16 | BRAIN HELICAL/HEAD    | 113                   | 2.1           | 18             | 120 | 311 | 1.0   | 1.0   |
| You       | SOM DEF AS    | STROKE                | 151                   | 2.4           | 17             | 117 | 195 | 0.6   | 1.0   |
| Highest   |               |                       | 235                   | 5.9           | 27             | 120 | 532 | 1.4   | 1.0   |

**A.2 List of All Protocols by Anatomic Region**  
**Alphabetical Order**  
**CHEST**

| Protocol Name               | Count of Scans | Percent of Scans | Effective Dose (mSv) | Scan Length (cm) | KVP | mAs | Pitch | Phase Count |
|-----------------------------|----------------|------------------|----------------------|------------------|-----|-----|-------|-------------|
| CAROTID_CTA                 | 2              | 0.03             | 12.1                 | 38               | 120 | 206 | 1.2   | 1.0         |
| CHEST CTA PE/THORAX         | 3              | 0.05             | 12.5                 | 34               | 120 | 300 | 1.0   | 2.7         |
| CHEST WITH CONTRAST/THORAX  | 56             | 0.92             | 9.6                  | 35               | 120 | 232 | 1.0   | 1.0         |
| CHEST WITH OUT/THORAX       | 626            | 10.33            | 8.5                  | 33               | 120 | 233 | 1.0   | 1.0         |
| CHEST_W                     | 203            | 3.35             | 8.7                  | 38               | 115 | 174 | 1.0   | 1.1         |
| CHEST_WO                    | 824            | 13.60            | 8.6                  | 34               | 117 | 180 | 1.0   | 1.0         |
| CHEST_WO_XC                 | 6              | 0.10             | 4.9                  | 32               | 100 | 103 | 0.6   | 1.0         |
| COMPLETE_AORTA              | 4              | 0.07             | 38.0                 | 115              | 118 | 207 | 0.7   | 2.5         |
| COMPLETE_AORTA_ANGIO        | 20             | 0.33             | 16.1                 | 88               | 108 | 142 | 0.8   | 1.9         |
| CTA_HEART_SPIRAL            | 30             | 0.50             | 10.2                 | 23               | 118 | 211 | 0.9   | 1.3         |
| DS_GATED_THORACIC_AORTA_CTA | 1              | 0.02             | 39.2                 | 66               | 120 | 250 | 0.7   | 3.0         |
| ENB CHEST WITH OUT/THORAX   | 4              | 0.07             | 9.6                  | 33               | 120 | 228 | 1.0   | 1.0         |
| ENBPROTOCOLLUNGWO           | 2              | 0.03             | 6.5                  | 34               | 110 | 159 | 1.0   | 1.0         |
| HIRES_LUNG                  | 109            | 1.80             | 11.6                 | 44               | 120 | 311 | 1.4   | 1.5         |
| HR_LUNG                     | 60             | 0.99             | 16.0                 | 59               | 128 | 176 | 1.0   | 1.9         |
| LUNG SCREENING/THORAX       | 72             | 1.19             | 1.5                  | 35               | 120 | 183 | 1.0   | 1.0         |
| LUNG_CHEST                  | 2              | 0.03             | 11.1                 | 38               | 110 | 125 | 1.0   | 1.5         |
| LUNG_W                      | 228            | 3.76             | 11.9                 | 37               | 117 | 199 | 0.8   | 1.0         |
| LUNG_WO                     | 280            | 4.62             | 11.0                 | 37               | 116 | 190 | 0.8   | 1.0         |
| MH HRCT SUPINE/THORAX       | 191            | 3.15             | 9.1                  | 44               | 120 | 241 | 1.0   | 1.9         |
| PEDS_CHEST_WO               | 3              | 0.05             | 2.3                  | 24               | 100 | 69  | 1.0   | 1.0         |
| PE_CHEST                    | 1516           | 25.02            | 8.1                  | 34               | 116 | 144 | 0.9   | 1.2         |
| PE_CHEST_ACR                | 9              | 0.15             | 9.1                  | 32               | 113 | 205 | 0.9   | 1.2         |
| PE_STUDY_1                  | 85             | 1.40             | 13.6                 | 35               | 118 | 203 | 0.8   | 1.3         |

**A.2 List of All Protocols by Anatomic Region**  
**Alphabetical Order**  
**HEAD**

| Protocol Name         | Count of Scans | Percent of Scans | Effective Dose (mSv) | Scan Length (cm) | KVP | mAs | Pitch | Phase Count |
|-----------------------|----------------|------------------|----------------------|------------------|-----|-----|-------|-------------|
| 01_BRAIN_LARGE_FOV    | 1              | 0.01             | 1.9                  | 19               | 120 | 266 | 1.0   | 1.0         |
| 01_BRAIN_PERFUSION    | 21             | 0.18             | 0.4                  | 5                | 82  | 361 | 1.0   | 1.0         |
| 01_CAROW_CTA          | 2              | 0.02             | 3.0                  | 12               | 100 | 242 | 1.0   | 1.0         |
| 01_COW_CTA            | 20             | 0.17             | 1.2                  | 21               | 120 | 107 | 0.7   | 1.1         |
| 01_FACIAL_BONES       | 218            | 1.84             | 1.1                  | 20               | 120 | 106 | 0.9   | 1.1         |
| 01_HEAD_SPIRAL        | 15             | 0.13             | 1.6                  | 19               | 120 | 129 | 0.8   | 1.1         |
| 01_IAC                | 7              | 0.06             | 0.8                  | 8                | 120 | 110 | 0.7   | 1.0         |
| 01_LANDMARK_PROTOCOL  | 5              | 0.04             | 0.6                  | 21               | 120 | 71  | 1.1   | 1.0         |
| 01_PROTOMED           | 2              | 0.02             | 1.1                  | 21               | 120 | 136 | 1.1   | 1.0         |
| 01_SINUS              | 21             | 0.18             | 0.5                  | 17               | 119 | 57  | 0.9   | 1.0         |
| 01_ST_NECK            | 2              | 0.02             | 3.1                  | 21               | 120 | 175 | 0.7   | 1.0         |
| 01_TRAUMA_HEAD_CSPINE | 2              | 0.02             | 2.1                  | 19               | 120 | 296 | 1.0   | 1.0         |
| AXIALBRAIN            | 5              | 0.04             | 2.0                  | 21               | 120 | 299 | 1.0   | 1.6         |
| BRAIN_HELICAL/HEAD    | 52             | 0.44             | 2.3                  | 19               | 120 | 300 | 1.0   | 1.0         |
| BRAIN_COMP_WWO        | 29             | 0.24             | 3.7                  | 34               | 119 | 162 | 0.6   | 1.7         |
| BRAIN_LARGE_FOV       | 2              | 0.02             | 7.9                  | 42               | 120 | 204 | 0.6   | 2.5         |
| BRAIN_PERFUSION       | 9              | 0.08             | 2.6                  | 13               | 97  | 205 | 0.9   | 2.3         |
| BRAIN_WO              | 6755           | 57.06            | 2.1                  | 20               | 119 | 261 | 0.9   | 1.0         |
| BRAIN_WO_XC           | 5              | 0.04             | 2.1                  | 21               | 120 | 146 | 0.6   | 1.2         |
| CAP_W_TRAUMA          | 1              | 0.01             | 2.8                  | 19               | 120 | 398 | 1.0   | 1.0         |
| CAROTID_COW_CTA       | 58             | 0.49             | 2.6                  | 28               | 112 | 196 | 0.7   | 1.2         |
| COW                   | 47             | 0.40             | 3.9                  | 37               | 120 | 181 | 0.7   | 2.0         |
| COW_CTA               | 72             | 0.61             | 2.8                  | 31               | 107 | 209 | 0.7   | 1.2         |
| C_SPINE_              | 1              | 0.01             | 1.9                  | 18               | 120 | 293 | 1.0   | 1.0         |



**A.2 List of All Protocols by Anatomic Region**  
**Alphabetical Order**  
**HEAD**

| Protocol Name               | Count of Scans | Percent of Scans | Effective Dose (mSv) | Scan Length (cm) | KVP | mAs | Pitch | Phase Count |
|-----------------------------|----------------|------------------|----------------------|------------------|-----|-----|-------|-------------|
| FACIAL                      | 19             | 0.16             | 2.2                  | 22               | 120 | 126 | 0.9   | 1.1         |
| FACIAL_BONES                | 209            | 1.77             | 1.4                  | 19               | 105 | 121 | 0.8   | 1.0         |
| FACIAL_ST                   | 1              | 0.01             | 1.5                  | 24               | 90  | 216 | 0.9   | 2.0         |
| HEADROUTINE                 | 1              | 0.01             | 2.3                  | 18               | 100 | 263 | 0.8   | 1.0         |
| HEAD_SPIRAL_WO_PEDS         | 8              | 0.07             | 2.2                  | 19               | 100 | 234 | 0.8   | 1.1         |
| IAC                         | 48             | 0.41             | 0.9                  | 8                | 107 | 211 | 0.8   | 1.0         |
| KIDS_IAC                    | 7              | 0.06             | 0.9                  | 10               | 100 | 192 | 0.8   | 1.1         |
| LANDMARK_SINUS              | 4              | 0.03             | 0.8                  | 11               | 100 | 157 | 1.0   | 1.0         |
| MASTOIDS                    | 19             | 0.16             | 1.0                  | 8                | 116 | 169 | 0.9   | 1.2         |
| MAX_FACE                    | 14             | 0.12             | 0.8                  | 17               | 120 | 89  | 0.8   | 1.1         |
| MH BRAIN HELICAL/HEAD       | 162            | 1.37             | 2.0                  | 18               | 120 | 316 | 1.0   | 1.0         |
| MH BRAIN W/WO HELICAL/HEAD  | 1              | 0.01             | 3.9                  | 39               | 120 | 325 | 1.0   | 2.0         |
| MH SINUS SUPINE/HEAD        | 29             | 0.24             | 0.6                  | 13               | 120 | 300 | 1.0   | 1.0         |
| MH SINUS/FACIAL SUPINE/HEAD | 76             | 0.64             | 0.5                  | 14               | 120 | 103 | 1.0   | 1.0         |
| ORBIT                       | 3              | 0.03             | 0.5                  | 12               | 120 | 83  | 0.8   | 1.0         |
| ORBIT_CONTRAST              | 4              | 0.03             | 0.3                  | 15               | 100 | 88  | 0.9   | 1.0         |
| ORBIT_FACIAL_BONES          | 1              | 0.01             | 0.2                  | 8                | 80  | 161 | 0.8   | 1.0         |
| PEDS_BRAIN_XC               | 14             | 0.12             | 1.9                  | 17               | 100 | 157 | 0.6   | 1.2         |
| PEDS_FACIAL_BONES           | 21             | 0.18             | 0.6                  | 14               | 91  | 113 | 0.8   | 1.1         |
| PEDS_HEAD_SPIRAL            | 192            | 1.62             | 1.9                  | 18               | 100 | 194 | 0.8   | 1.2         |
| PEDS_SINUS                  | 2              | 0.02             | 0.2                  | 11               | 100 | 37  | 0.8   | 1.0         |
| PEDS_SINUS_FACIAL           | 1              | 0.01             | 0.3                  | 16               | 100 | 54  | 0.8   | 1.0         |
| PEDS_ST_NECK                | 1              | 0.01             | 0.4                  | 18               | 80  | 139 | 1.0   | 1.0         |
| PERFUSION                   | 1              | 0.01             | 2.4                  | 8                | 100 | 213 | 0.8   | 2.0         |

**A.2 List of All Protocols by Anatomic Region  
Alphabetical Order  
CHEST/ABDOMEN/PELVIS**

| Protocol Name               | Count of Scans | Percent of Scans | Effective Dose (mSv) | Scan Length (cm) | KVP | mAs | Pitch | Phase Count |
|-----------------------------|----------------|------------------|----------------------|------------------|-----|-----|-------|-------------|
| 01_CAP                      | 2              | 0.15             | 17.7                 | 86               | 120 | 121 | 0.8   | 1.0         |
| 01_CHEST                    | 1              | 0.08             | 18.1                 | 81               | 120 | 107 | 0.7   | 2.0         |
| 01_COMPLETE_AORTA_ANGIO     | 2              | 0.15             | 24.6                 | 122              | 120 | 155 | 0.8   | 2.0         |
| 01_THORANGIO                | 1              | 0.08             | 21.0                 | 88               | 120 | 164 | 0.8   | 2.0         |
| 3_PHASE_LIVER               | 2              | 0.15             | 27.9                 | 163              | 110 | 130 | 0.8   | 2.0         |
| ABDOMEN ROUTINE W/O/ABDOMEN | 6              | 0.45             | 17.8                 | 79               | 120 | 235 | 1.0   | 1.0         |
| ABDOMEN_WO                  | 2              | 0.15             | 21.7                 | 124              | 117 | 174 | 1.2   | 2.0         |
| ABD_PEL_COMPLETE            | 1              | 0.08             | 11.8                 | 106              | 100 | 123 | 0.8   | 2.0         |
| ABD_PEL_WITH                | 1              | 0.08             | 24.8                 | 80               | 130 | 282 | 1.5   | 1.0         |
| ABD_PEL_WO                  | 19             | 1.43             | 28.3                 | 101              | 120 | 203 | 1.0   | 1.1         |
| ABD_WO                      | 22             | 1.65             | 40.0                 | 118              | 119 | 228 | 0.8   | 1.5         |
| ADRENALS                    | 1              | 0.08             | 16.5                 | 127              | 100 | 103 | 0.8   | 4.0         |
| CALCIUM_SCORING             | 1              | 0.08             | 27.6                 | 26               | 120 | 300 | 0.7   | 1.0         |
| CAP                         | 293            | 22.03            | 34.9                 | 84               | 120 | 244 | 0.8   | 1.2         |
| CAP WO/W/THORAX             | 21             | 1.58             | 27.5                 | 95               | 120 | 274 | 1.0   | 1.2         |
| CAP_COMP                    | 21             | 1.58             | 33.1                 | 103              | 120 | 255 | 1.0   | 1.3         |
| CAP_COMPLETE                | 15             | 1.13             | 24.7                 | 111              | 124 | 173 | 1.2   | 1.5         |
| CAP_WITH                    | 252            | 18.95            | 18.7                 | 84               | 121 | 172 | 1.1   | 1.0         |
| CAP_WO                      | 167            | 12.56            | 19.4                 | 82               | 120 | 175 | 1.0   | 1.0         |
| CAP_W_TRAUMA                | 90             | 6.77             | 27.1                 | 91               | 139 | 203 | 1.4   | 1.0         |
| CHEST WITH OUT/THORAX       | 17             | 1.28             | 17.0                 | 78               | 120 | 235 | 1.0   | 1.0         |
| CHEST_W                     | 7              | 0.53             | 18.7                 | 120              | 112 | 177 | 1.1   | 2.4         |
| CHEST_WO                    | 11             | 0.83             | 20.9                 | 86               | 121 | 183 | 1.0   | 1.1         |
| COMPLETE_AORTA              | 2              | 0.15             | 39.0                 | 146              | 120 | 231 | 0.8   | 1.5         |
