# Supplementary material
Source: PubMed Central journal article supplement (PMC7105953)
Supplement: jamainternmed-180-666-s003.pdf [file jamainternmed-180-666-s003.pdf]

## **Data Sharing Statement**

Smith-Bindman. Comparison of the Effectiveness of Single-Component and Multicomponent Interventions for Reducing Radiation Doses in Patients Undergoing Computed Tomography. *JAMA Intern Med*. Published March 02, 2020. 10.1001/jamainternmed.2020.0064

### **Data**

**Data available:** No
